# Supplementary material for: CellCallEXT: Analysis of Ligand–Receptor and Transcription Factor Activities in Cell–Cell Communication of Tumor Immune Microenvironment
Source: MDPI journal article supplement (doi:10.3390/cancers14194957), 2022-10-10
Supplement: s1 [file s1]

Shouguo Gao \*, Xingmin Feng , ZhijieWu , Sachiko Kajigaya and Neal S. Young

Hematopoiesis and Bone Marrow Failure Laboratory, Hematology Branch, National Heart, Lung, and Blood Institute, National Institutes of Health, Bethesda, MD 20892, USA

\* Correspondence: shouguo.gao@nih.gov

## Supplementary Figures

### Contents

**Supplementary Fig. S1.** Common ligand (L)-receptor (R) pairs in intercellular communications among tumors and immune cells, and common pathways enriched in identified L-R pairs.

**Supplementary Fig. S2.** Ligand (L)-receptor (R) pairs by sender-receiver, sender only or receiver only.

**Supplementary Fig. S3.** Altered ligand (L)-receptor (R) pairs among cell populations in tumor-specific intercellular communications in BRCA\_GSE114727.

**Supplementary Fig. S4.** Pathway activities in intercellular communications among cell populations of BRCA\_GSE114727.

**Supplementary Fig. S5.** Altered ligand (L)-receptor (R) pairs among cell populations in tumor-specific intercellular communications in CRC\_GSE139555:

**Supplementary Fig. S6.** Pathway activities in intercellular communications among cell populations of CRC\_GSE139555.

**Supplementary Fig. S7.** Altered ligand (L)-receptor (R) pairs among cell populations in tumor-specific intercellular communications in CRC\_GSE146771\_Smartseq2.

**Supplementary Fig. S8.** Pathway activities in intercellular communications among cell populations of CRC\_GSE146771\_Smartseq2.

**Supplementary Fig. S9.** Altered ligand (L)-receptor (R) pairs among cell populations in tumor-specific intercellular communications in KIRC\_GSE139555.

**Supplementary Fig. S10.** Pathway activities in intercellular communications among cell populations of KIRC\_GSE139555.

**Supplementary Fig. S11.** Altered ligand (L)-receptor (R) pairs among cell populations in tumor-specific intercellular communications in AML\_GSE116256.

**Supplementary Fig. S12.** Pathway activities in intercellular communications among cell populations of AML\_GSE116256.

**Supplementary Fig. S13.** Altered ligand (L)-receptor (R) pairs among cell populations in tumor-specific intercellular communications in LIHC\_GSE140228\_Smartseq2.

**Supplementary Fig. S14.** Pathway activities in intercellular communications among cell populations of LIHC\_GSE140228\_Smartseq2.

**Supplementary Fig. S15.** Altered ligand (L)-receptor (R) pairs among cell populations in tumor-specific intercellular communications in NSCLC\_GSE117570.

**Supplementary Fig. S16.** Pathway activities in intercellular communications among cell populations of NSCLC\_GSE117570.

**Supplementary Fig. S17.** Altered ligand (L)-receptor (R) pairs among cell populations in tumor-specific intercellular communications in NSCLC\_GSE139555.

**Supplementary Fig. S18.** Pathway activities in intercellular communications among cell populations of NSCLC\_GSE139555.

**Supplementary Fig. S19.** Ligand (L)-receptor (R) pairs in intercellular communications in DADA2 patients identified by NicheNet and CellCallEXT.

**Supplementary Fig. S20.** Sankey plot of altered ligand (L)-receptor (R) pairs and downstream transcription factors (TFs) in intercellular communications from T cells to monocytes of DADA2 patents.

**Supplementary Fig. S21.** Sankey plot of altered ligand (L)-receptor (R) pairs and downstream transcription factors (TFs) in intercellular communications from monocytes to T cells of DADA2 patents.

## A Intercellular communications

### Common L-R pairs

IFNG-IFNGR1  
 IFNG-IFNGR2  
 CCL4L1-CCR1  
 MFNG-NOTCH2  
 OSM-IL6ST  
 F11R-F11R  
 CXCL16-CXCR6  
 CCL3-CCR1  
 CCL4-CCR1  
 CCL5-CCR1  
 CCL5-CXCR3  
 TGFB1-TGFB1  
 TGFB1-TGFB2  
 CD40LG-CD40  
 LY96-TLR4  
 CCL3-CXCR5  
 CCL4-CXCR5  
 CCL5-CXCR5  
 TNF-TNFRSF1A  
 TNF-TNFRSF1B  
 TNFSF14-LTBR  
 TNFSF14-TNFRSF14  
 LFNG-NOTCH2  
 FASLG-FAS  
 TNFSF10-TNFRSF10B

## B Enriched in identical L-R pairs

### Common pathways

Chemokine signaling pathway  
 Cytokine signaling in the immune system  
 Diseases  
 Immune system  
 Signaling by interleukins  
 Pathways in cancers  
 Herpes simplex virus 1 infection  
 HIF-1 signaling pathway  
 Interferon gamma signaling  
 Interferon signaling  
 Protein metabolism  
 Post-translational protein modification  
 Signaling by NOTCH  
 Signaling by TGF-beta family members  
 Signaling by TGF-beta receptor complex  
 Jak-STAT signaling pathway  
 Necroptosis  
 Osteoclast differentiation  
 PD-L1 expression and the PD-1 checkpoint pathway in cancer  
 Toxoplasmosis  
 Adipocytokine signaling pathway  
 Hepatitis C  
 Death receptor signalling  
 Innate immune system  
 Interleukin-4 and interleukin-13 signaling  
 MyD88-dependent cascade initiated on endosome  
 MyD88:MAL(TIRAP) cascade initiated on plasma membrane  
 Pre-NOTCH expression and processing  
 Toll-like receptor cascades  
 Toll-like receptor 2 (TLR2) cascade  
 Toll-like receptor 4 (TLR4) cascade  
 Toll-like receptor 7/8 (TLR7/8) cascade  
 Toll-like receptor 9 (TLR9) cascade  
 Toll-like receptor TLR1:TLR2 cascade  
 Toll-like receptor TLR6:TLR2 cascade  
 TRAF6 mediated induction of NFkB and MAP kinases upon TLR7/8 or 9 activation  
 Human cytomegalovirus infection  
 Human T-cell leukemia virus 1 infection  
 Insulin resistance  
 MAPK signaling pathway  
 Pathogenic Escherichia coli infection  
 Th1 and Th2 cell differentiation  
 Th17 cell differentiation  
 TNF signaling pathway

**Fig. S1. (A)** Common ligand (L)-receptor (R) pairs in the intercellular communications among tumors and immune cells. **(B)** Common pathways enriched in identified L-R pairs.

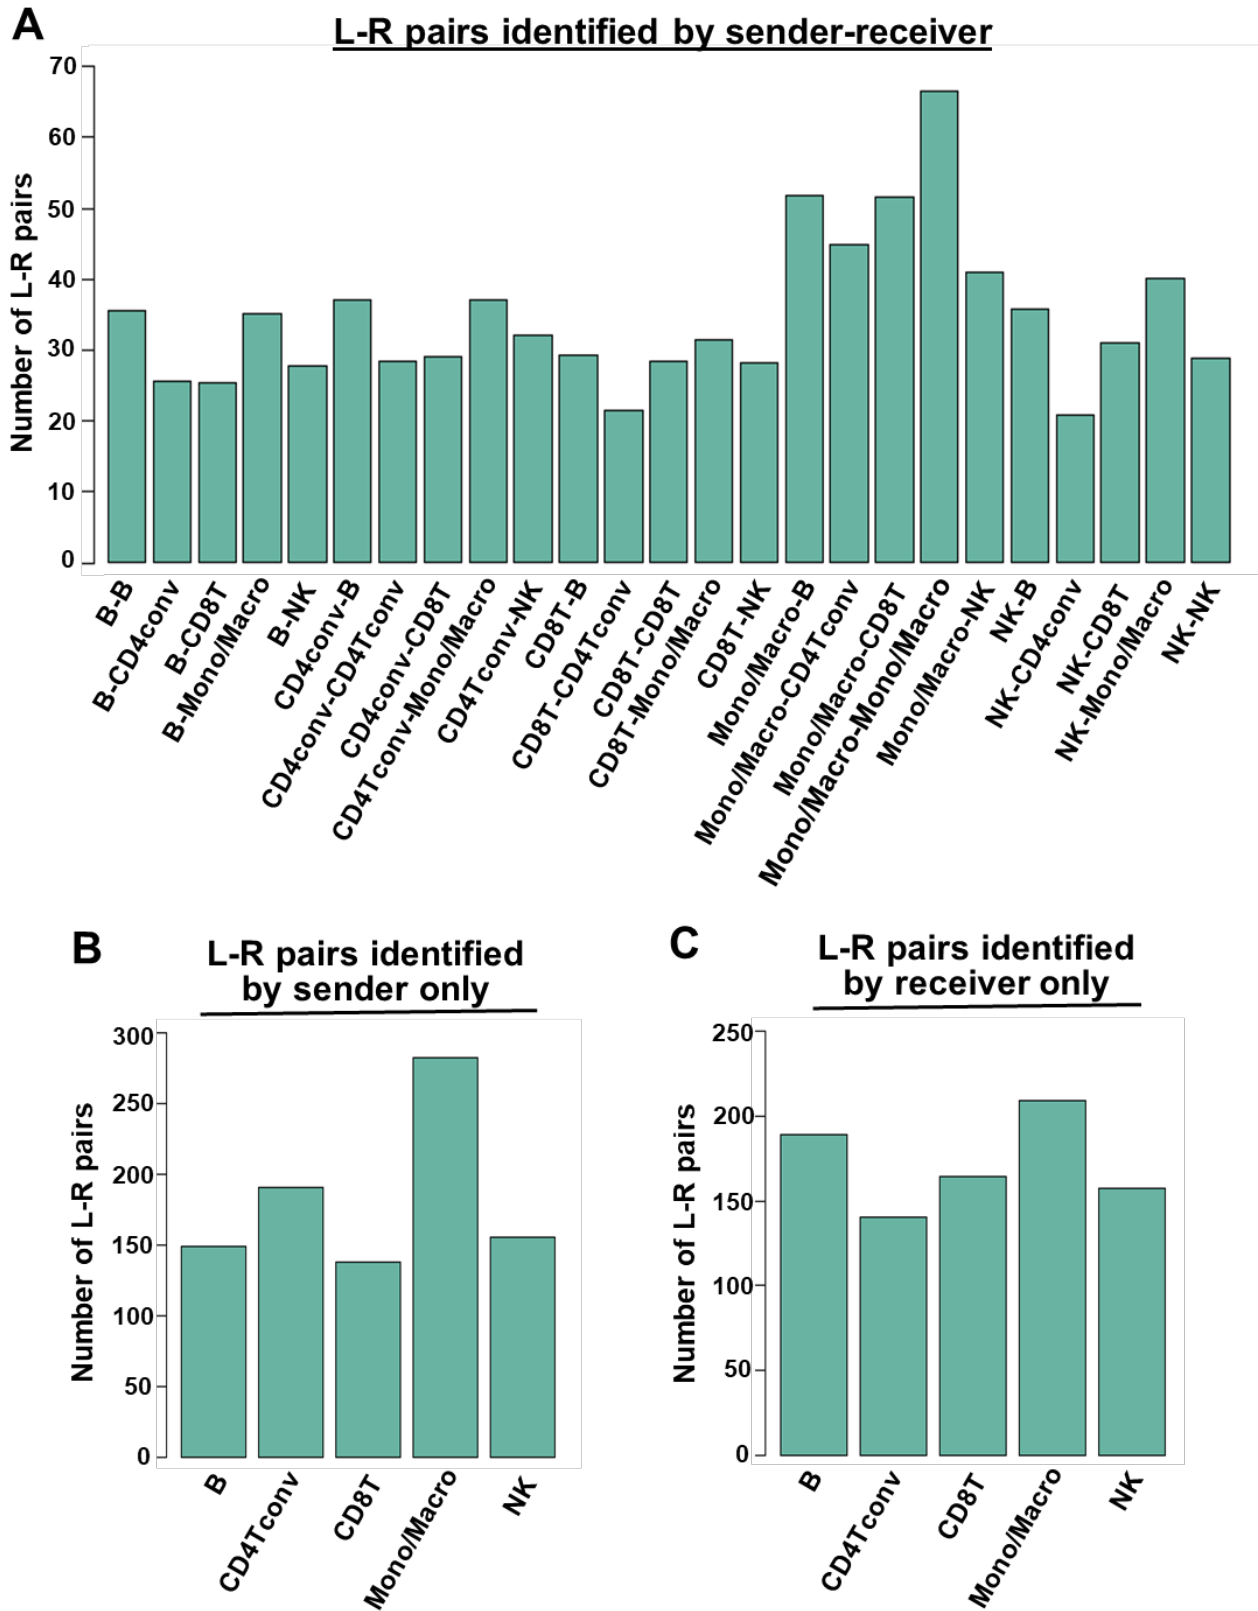

**Fig. S2.** Ligand (L)-receptor (R) pairs by sender-receiver (A), sender only (B) or receiver only (C): conventional CD4<sup>+</sup> T cells (CD4Tconv), CD8<sup>+</sup> T cells (CD8T), monocytes/macrophages (Mono/Macro), B cells (B) and natural killer cells (NK).

### Altered L-R pairs among cell populations (BRCA\_GSE114727)

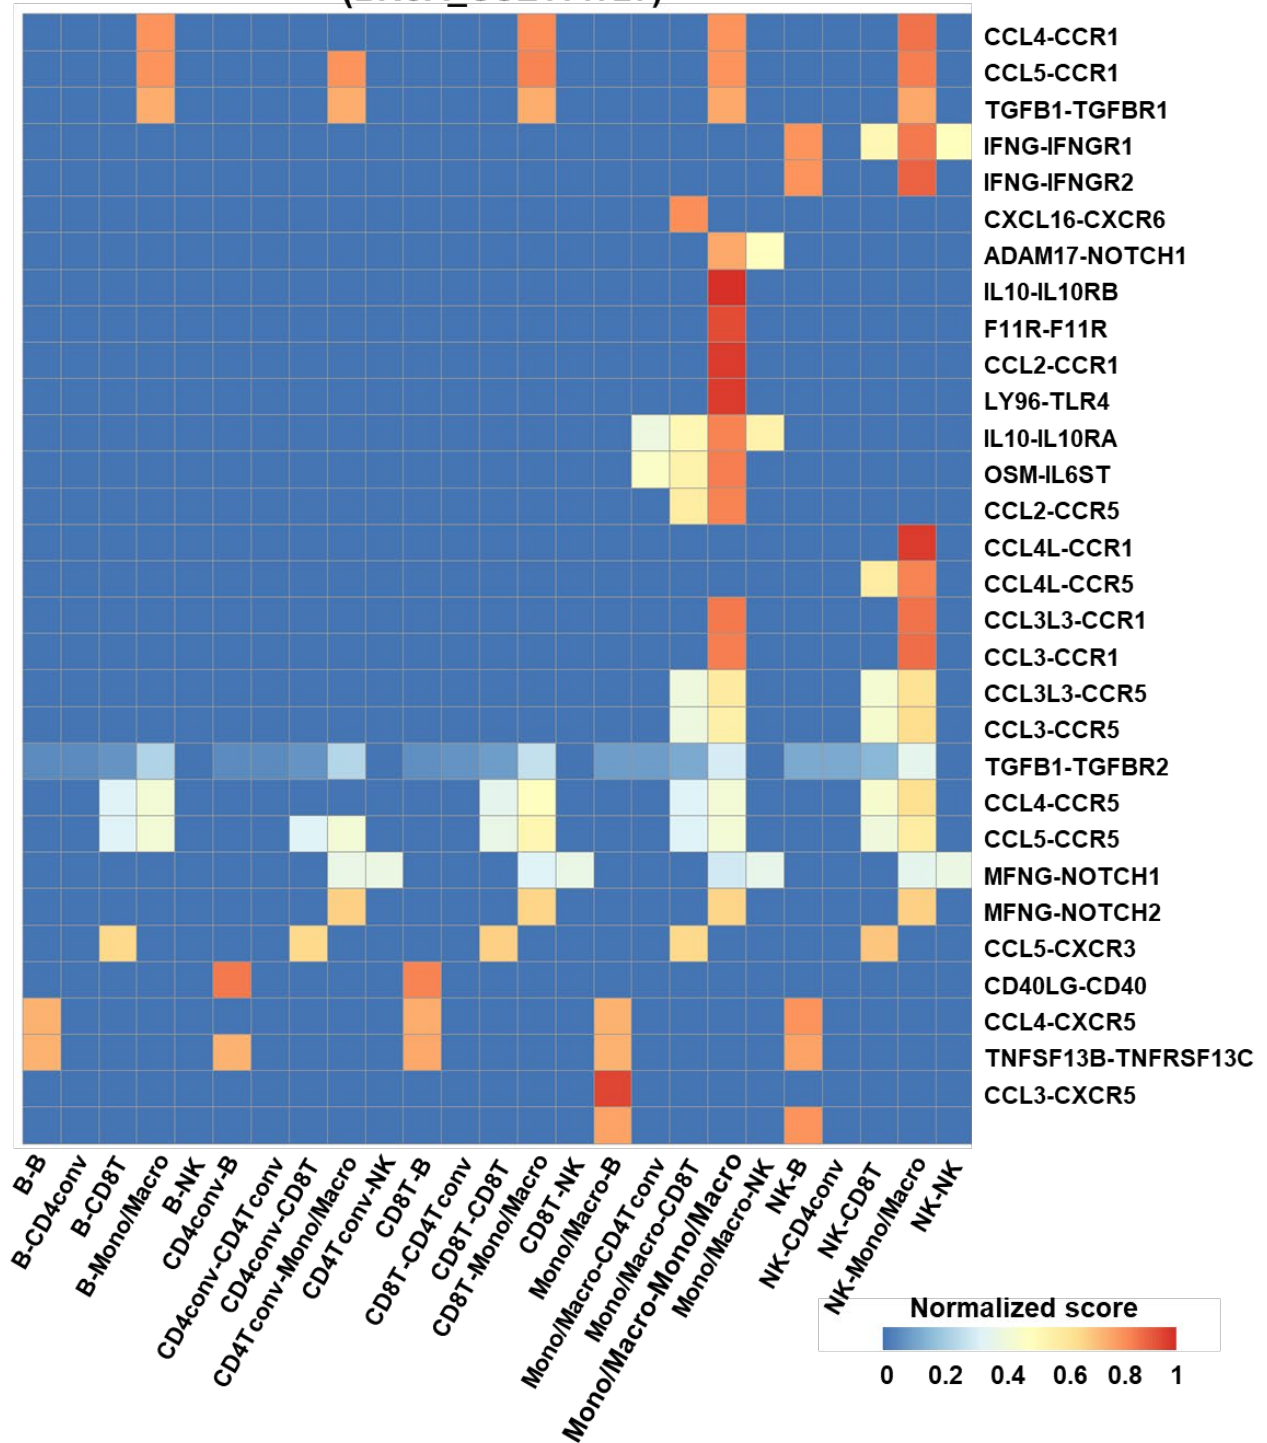

**Fig. S3.** Altered ligand (L)-receptor (R) pairs among cell populations in tumor-specific intercellular communications in BRCA\_GSE114727: conventional CD4<sup>+</sup> T cells (CD4Tconv), CD8<sup>+</sup> T cells (CD8T), monocytes/macrophages (Mono/Macro), B cells (B) and natural killer cells (NK). Only transcription factors with GSEA *P*-adjusted values < 0.1 were kept for analysis. A cutoff to define correlated target genes for regulon was denoted as a correlation coefficient = 0.1.

## Pathway activities of intercellular communications among cell populations

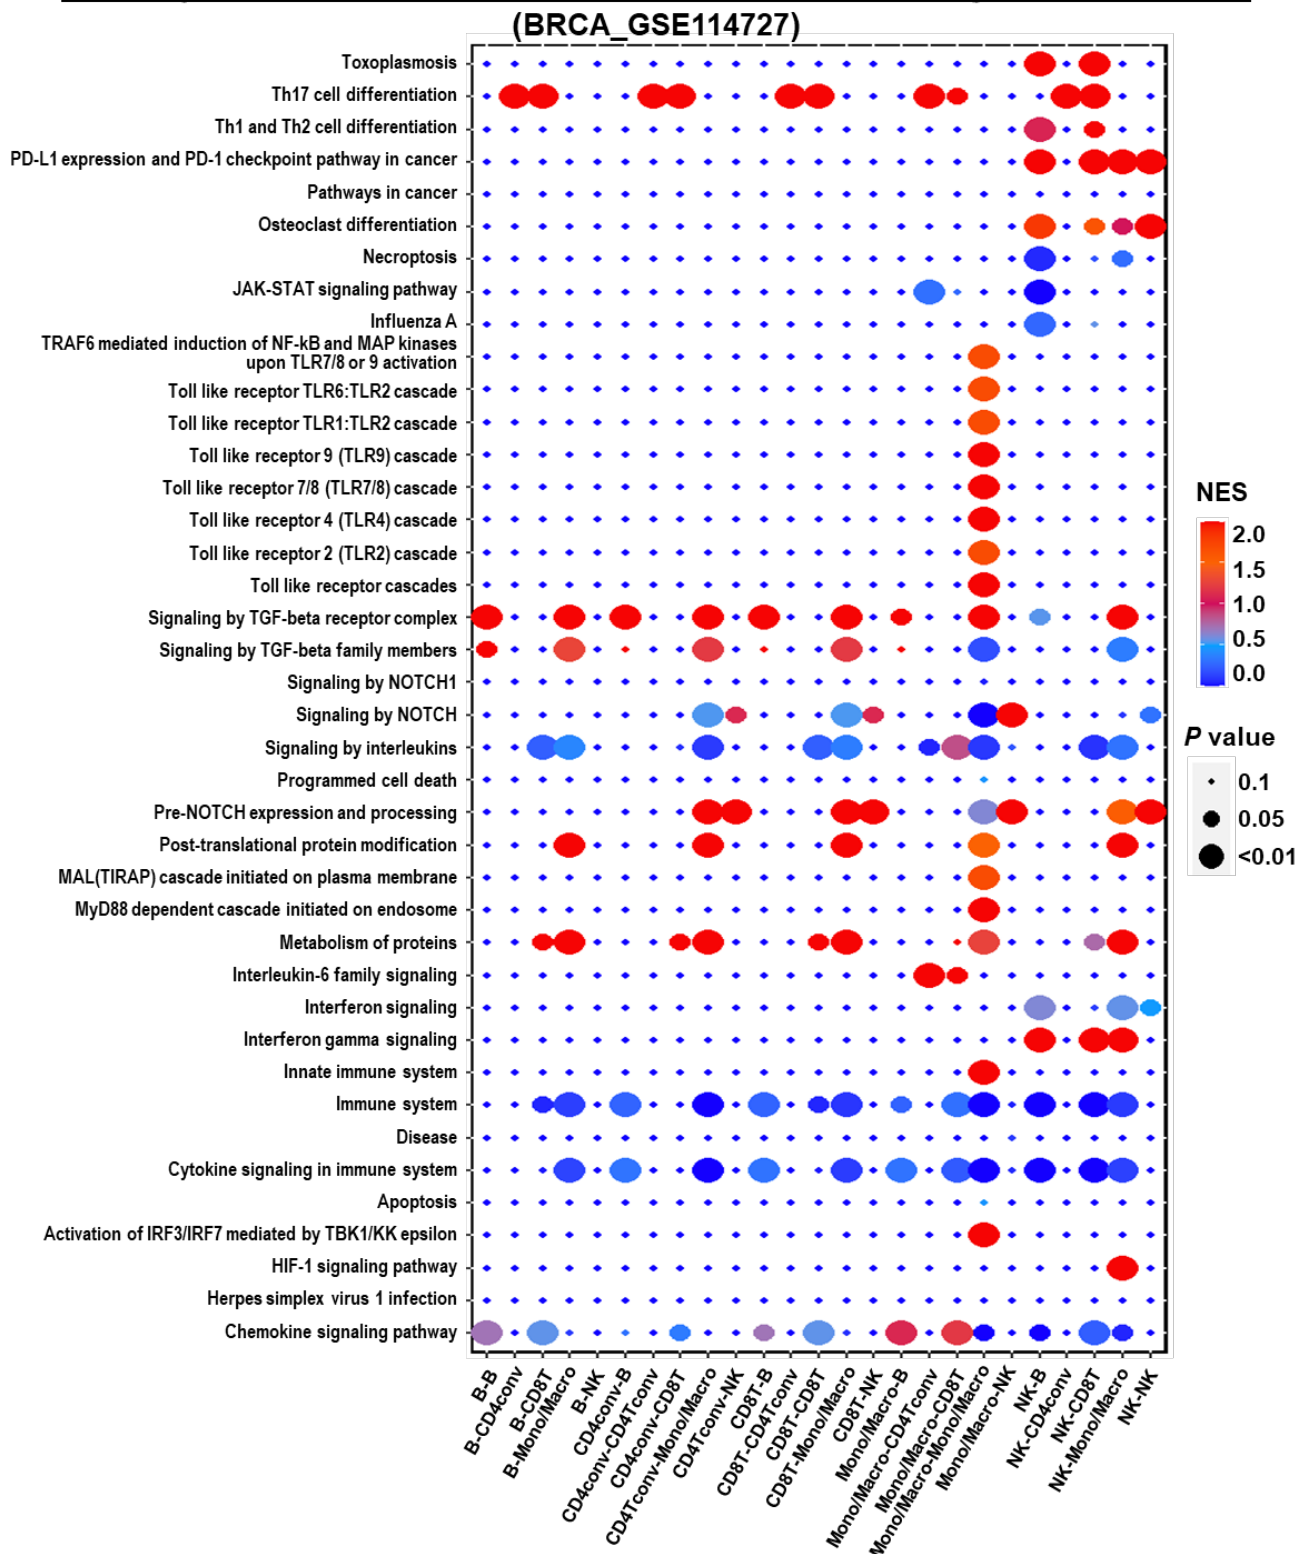

**Fig. S4.** Pathway activities of intercellular communications among cell populations of BRCA\_GSE114727: conventional CD4<sup>+</sup> T cells (CD4Tconv), CD8<sup>+</sup> T cells (CD8T), monocytes/macrophages (Mono/Macro), B cells (B) and natural killer cells (NK). Only pathways with  $P < 0.1$  in at least one cell populations were retained for analysis. NES, normalized enrichment score.



## Altered L-R pairs among cell populations (CRC\_GSE139555)

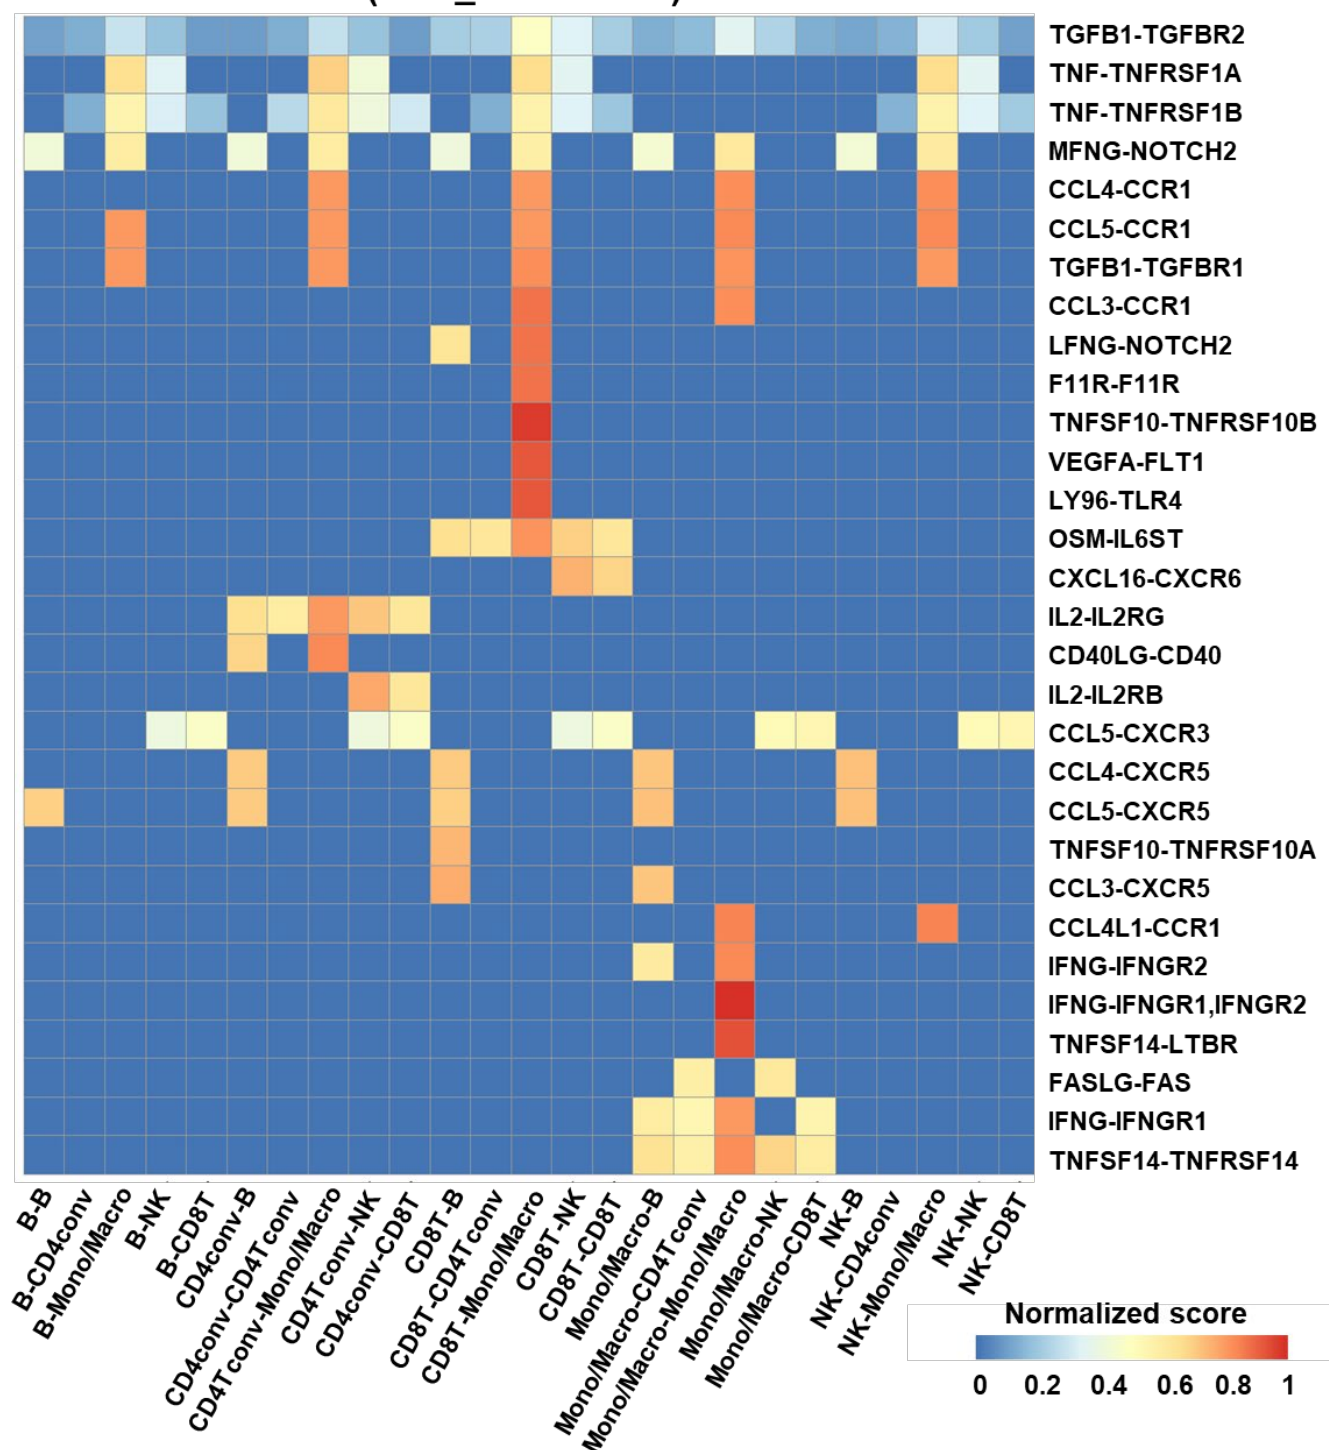

**Fig. S5.** Altered ligand (L)-receptor (R) pairs among cell populations in tumor-specific intercellular communications in CRC\_GSE139555: conventional CD4<sup>+</sup> T cells (CD4Tconv), CD8<sup>+</sup> T cells (CD8T), monocytes/macrophages (Mono/Macro), B cells (B) and natural killer cells (NK). Only transcription factors with GSEA *P*-adjusted values < 0.2 were kept for analysis. A cutoff to define correlated target genes for regulon was denoted as a correlation coefficient = 0.02.

## Pathway activities of intercellular communications among cell populations (CRC\_GSE139555)

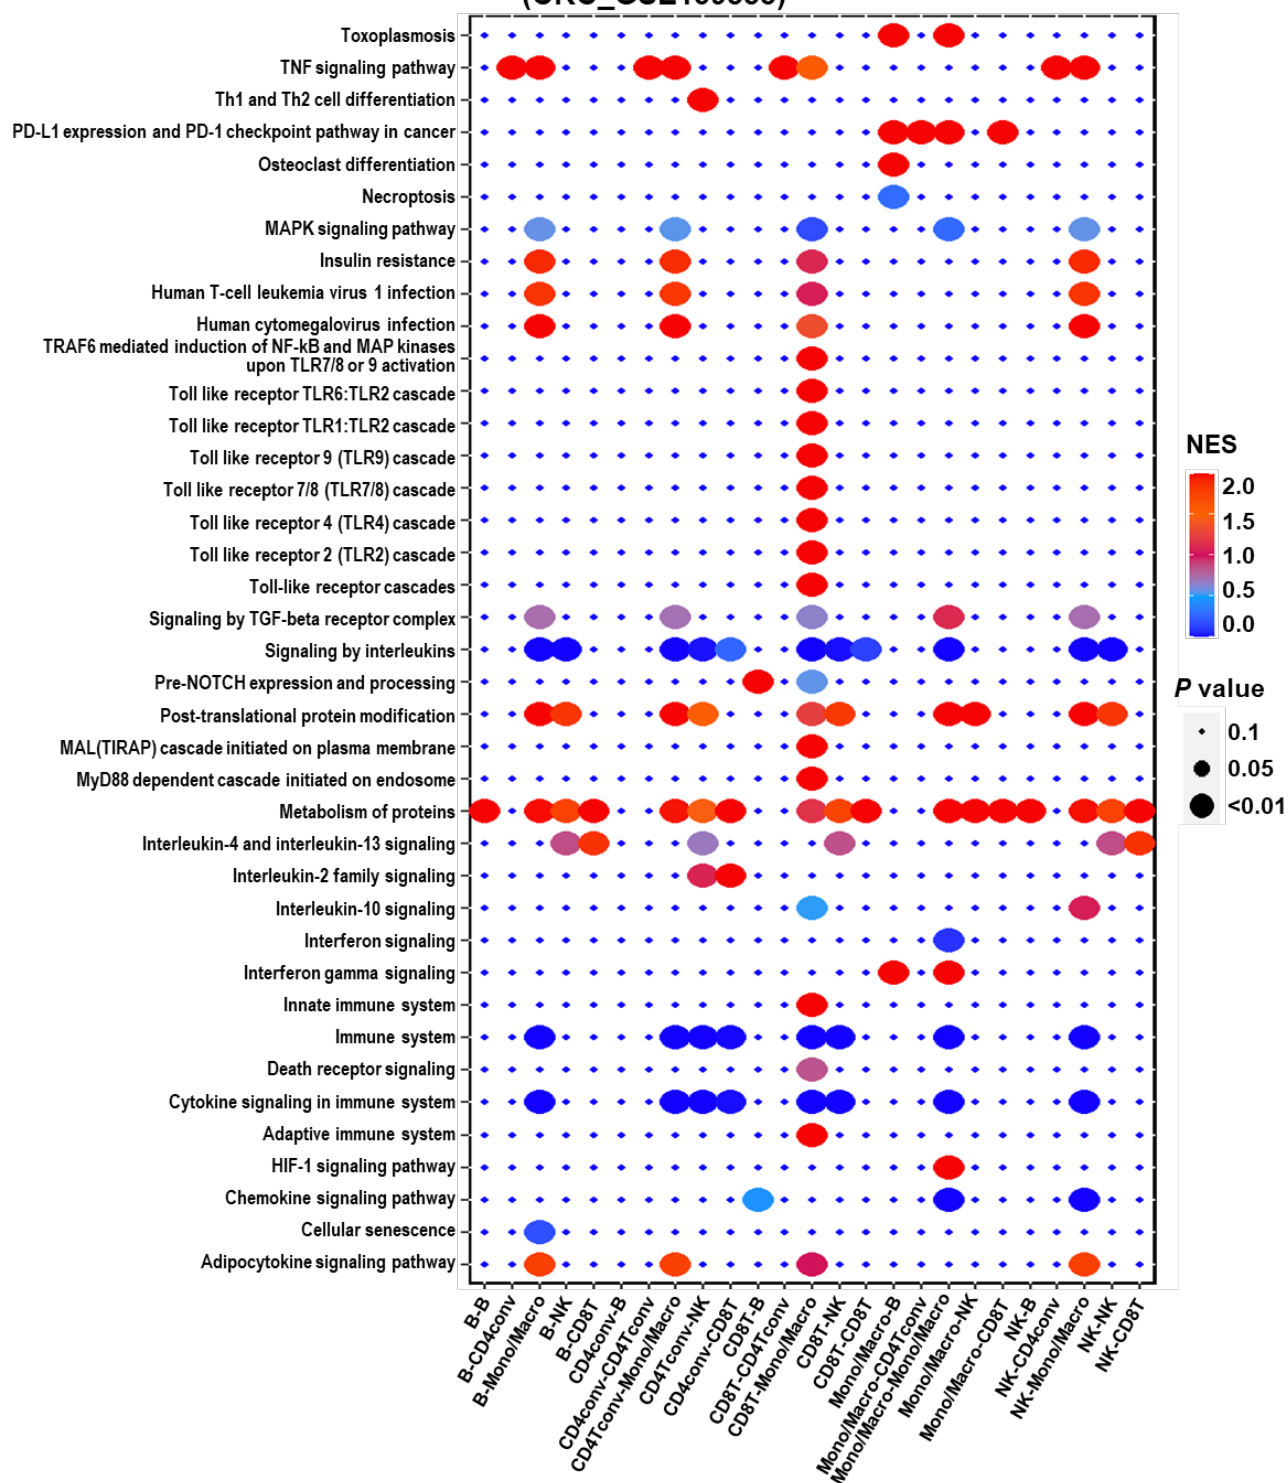

**Fig. S6.** Pathway activities of intercellular communications among cell populations of CRC\_GSE139555: conventional CD4<sup>+</sup> T cells (CD4Tconv), CD8<sup>+</sup> T cells (CD8T), monocytes/macrophages (Mono/Macro), B cells (B) and natural killer cells (NK). Only pathways with  $P < 0.000001$  in at least one cell populations were kept for visualization. NES, normalized enrichment score.



**Altered L-R pairs among cell populations**  
(CRC\_GSE146771\_Smartseq2)

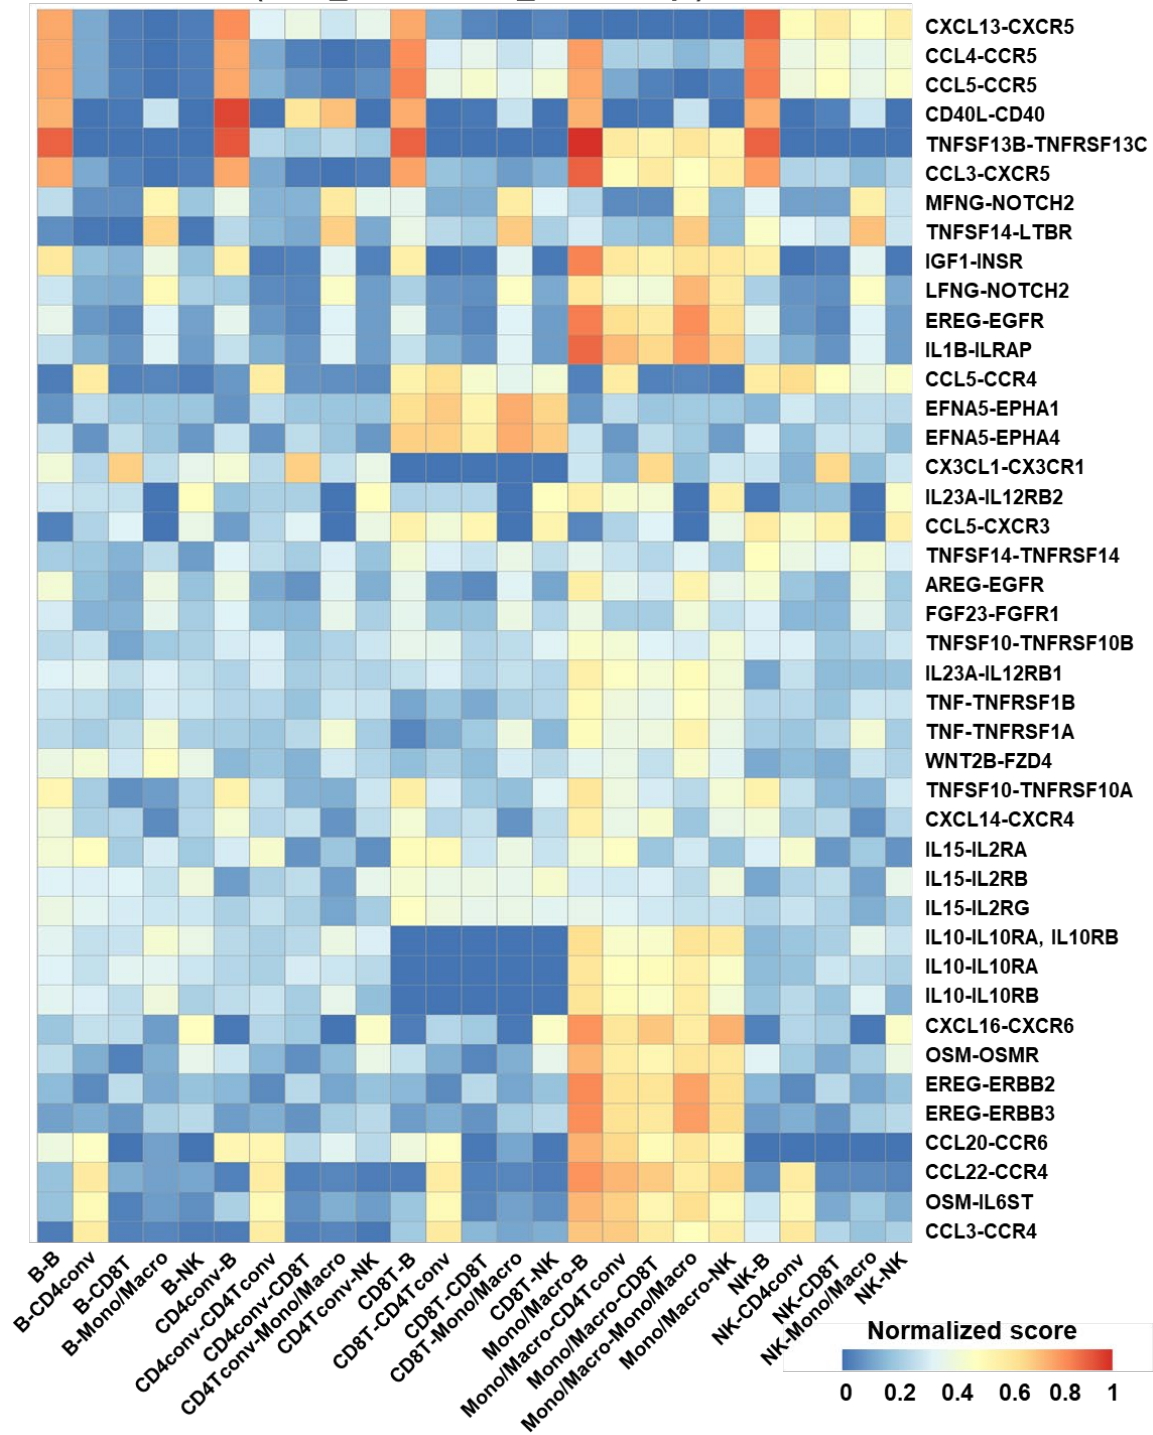

**Fig. S7.** Altered ligand (L)-receptor (R) pairs among cell populations for tumor-specific intercellular communications in CRC\_GSE146771\_Smartseq2: conventional CD4<sup>+</sup> T cells (CD4Tconv), CD8<sup>+</sup> T cells (CD8T), monocytes/macrophages (Mono/Macro), B cells (B) and natural killer cells (NK). Only transcription factors with GSEA *P*-adjusted values < 0.05 were kept for analysis. A cutoff to define correlated target genes for regulon was denoted as a correlation coefficient = 0.05.

**Pathway activities of intercellular communications among cell populations**  
(CRC\_GSE146771\_Smartseq2)

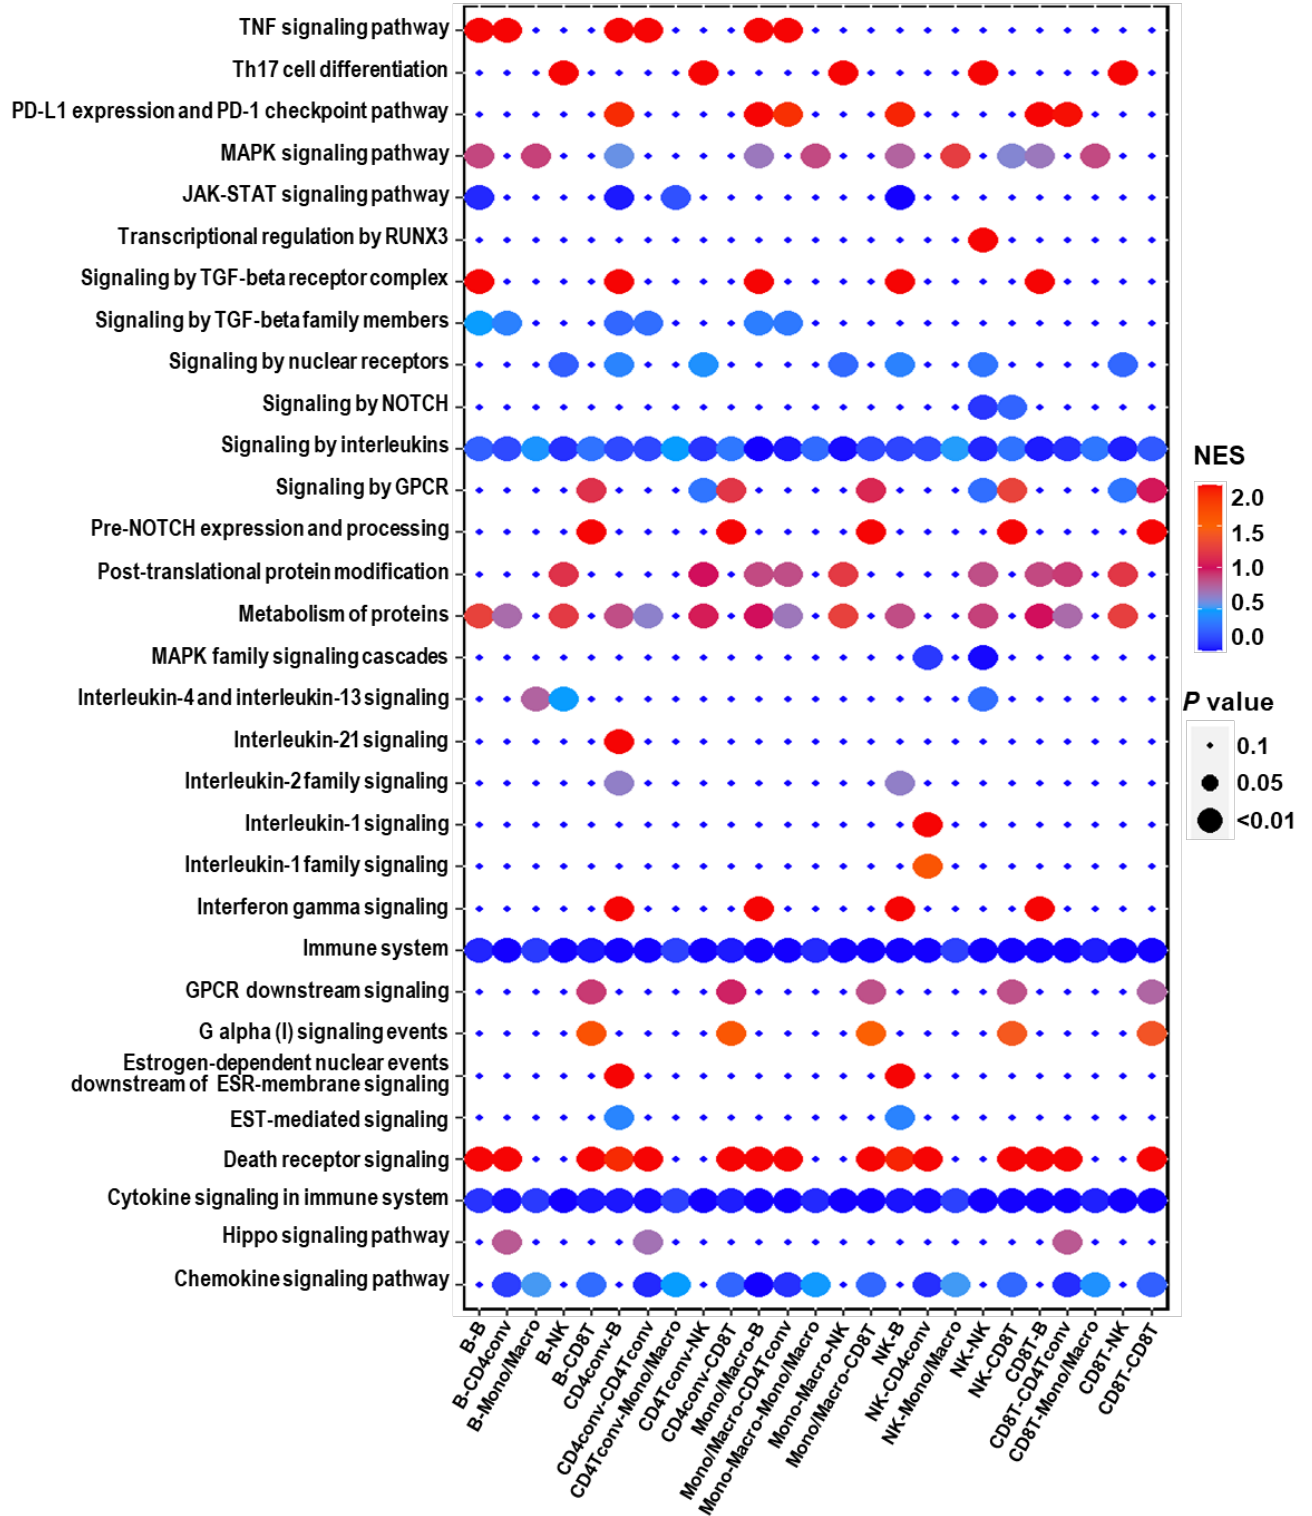

**Fig. S8.** Pathway activities of intercellular communications among cell populations of CRC\_GSE146771\_Smartseq2: conventional CD4<sup>+</sup> T cells (CD4Tconv), CD8<sup>+</sup> T cells (CD8T), monocytes/macrophages (Mono/Macro), B cells (B) and natural killer cells (NK). Only pathways with  $P < 0.000001$  in at least one cell populations were kept for visualization. NES, normalized enrichment score.

## Altered L-R pairs among cell populations (KIRC\_GSE139555)

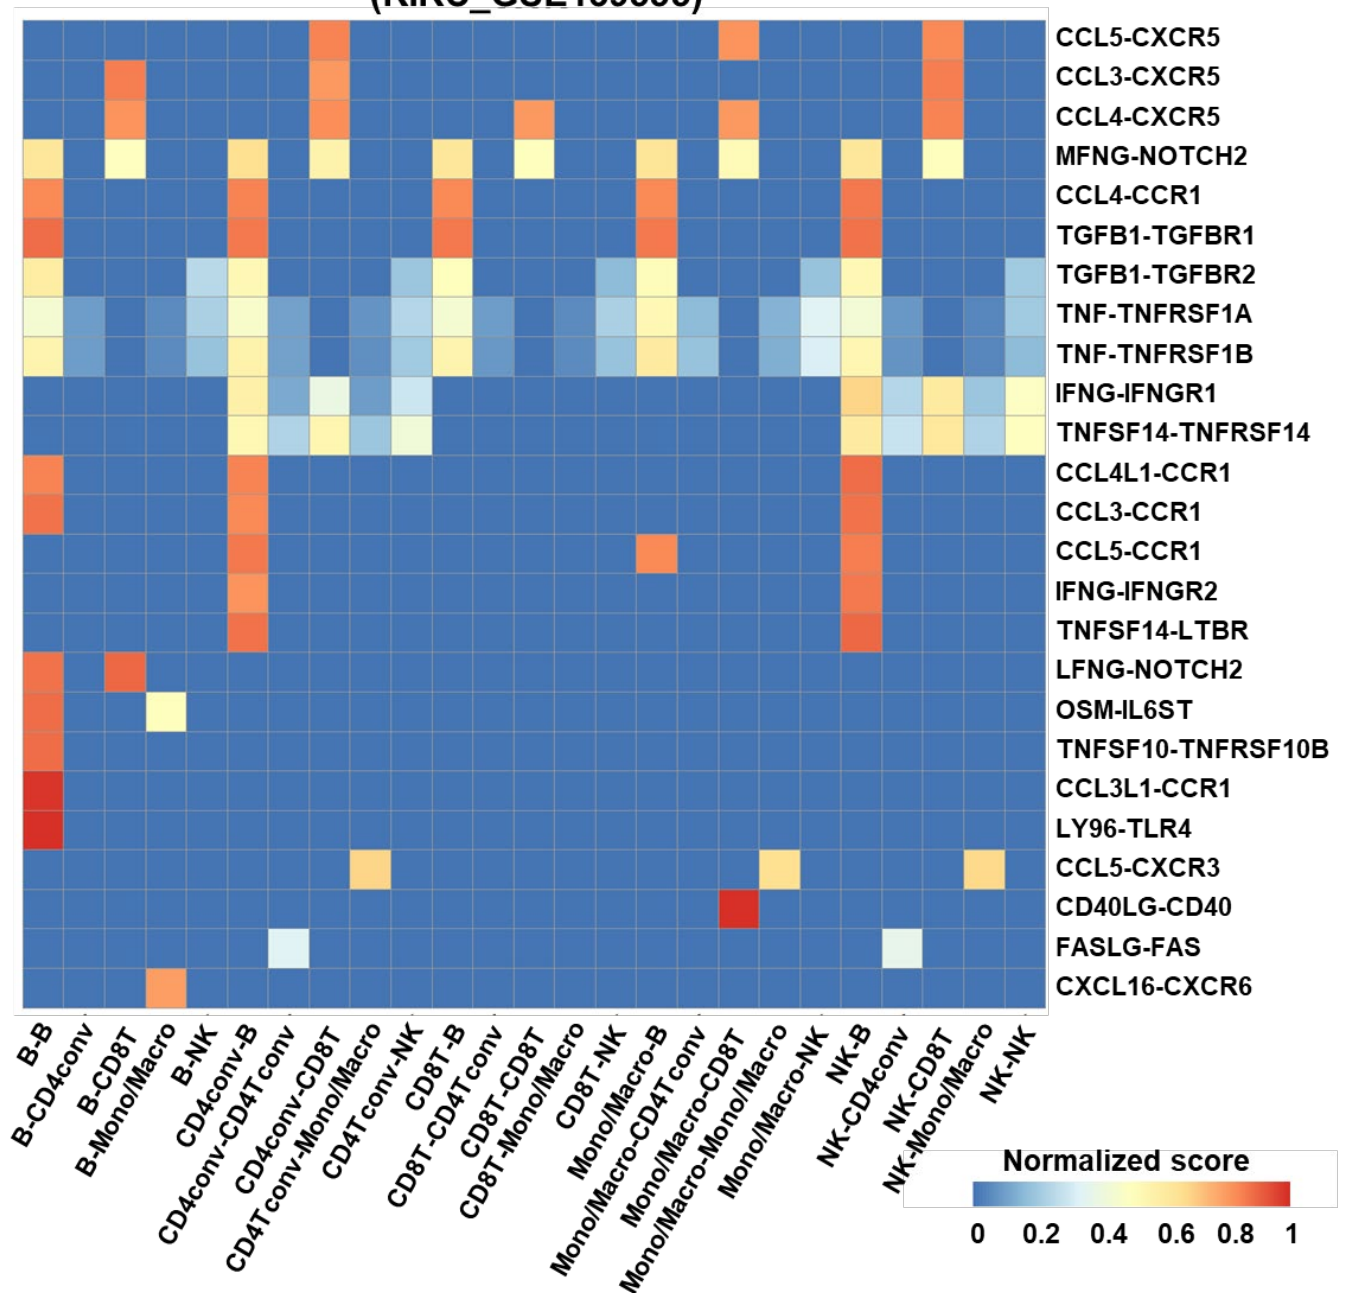

**Fig. S9.** Altered ligand (L)-receptor (R) pairs among cell populations for tumor-specific intercellular communications in KIRC\_GSE139555: conventional CD4<sup>+</sup> T cells (CD4Tconv), CD8<sup>+</sup> T cells (CD8T), monocytes/macrophages (Mono/Macro), B cells (B) and natural killer cells (NK). Only transcription factors with GSEA *P*-adjusted values < 0.3 were kept for analysis. A cutoff to define correlated target genes for regulon was denoted as a correlation coefficient = 0.02.

## Pathway activities of intercellular communications among cell populations (KIRC\_GSE139555)

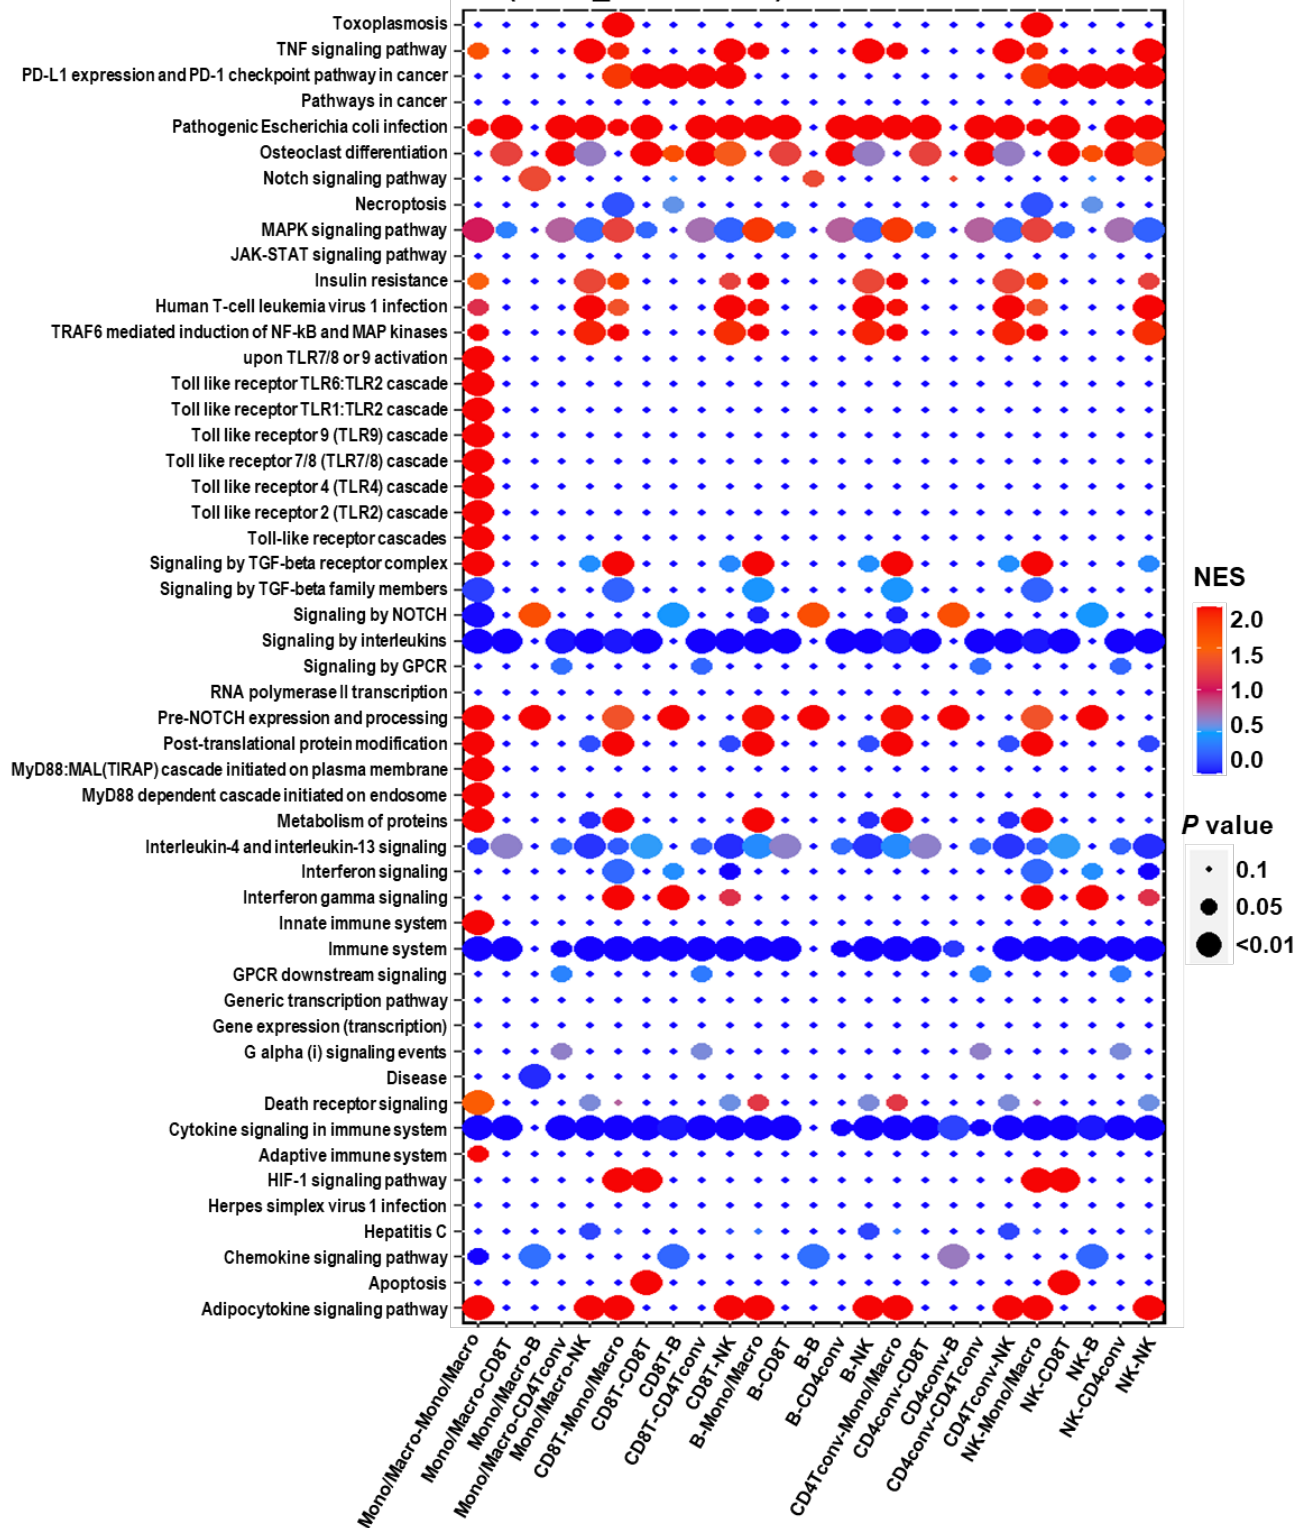

**Fig. S10.** Pathway activities of intercellular communications among cell populations of KIRC\_GSE139555: conventional CD4<sup>+</sup> T cells (CD4Tconv), CD8<sup>+</sup> T cells (CD8T), monocytes/macrophages (Mono/Macro), B cells (B) and natural killer cells (NK). Only pathways with  $P < 0.000001$  in at least one cell populations were retained for visualization. NES, normalized enrichment score.



## Altered L-R pairs among cell populations (AML\_GSE116256)

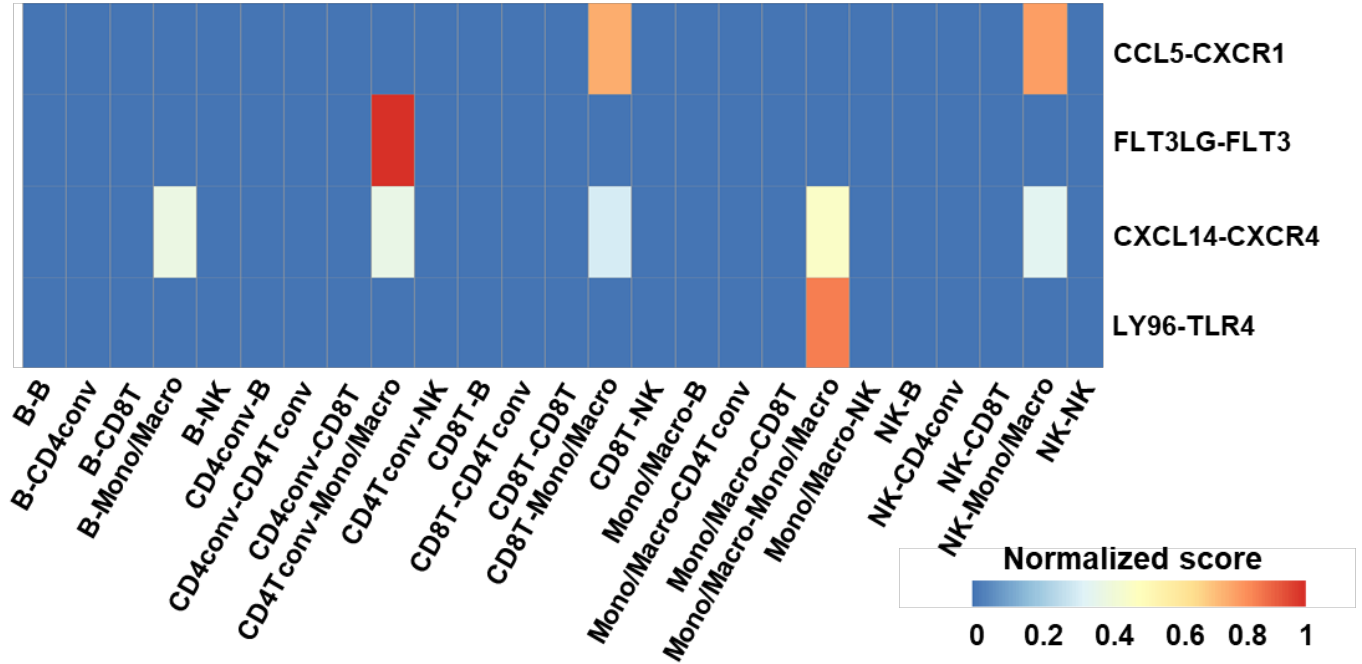

**Fig. S11.** Altered ligand (L)-receptor (R) pairs among cell populations in tumor-specific intercellular communications in AML\_GSE116256: conventional CD4<sup>+</sup> T cells (CD4Tconv), CD8<sup>+</sup> T cells (CD8T), monocytes/macrophages (Mono/Macro), B cells (B) and natural killer cells (NK). Only transcription factors with GSEA *P*-adjusted values < 0.1 were retained for analysis. A cutoff to define correlated target genes for regulon was denoted as a correlation coefficient = 0.1.

## Pathway activities of intercellular communications among cell populations (AML\_GSE116256)

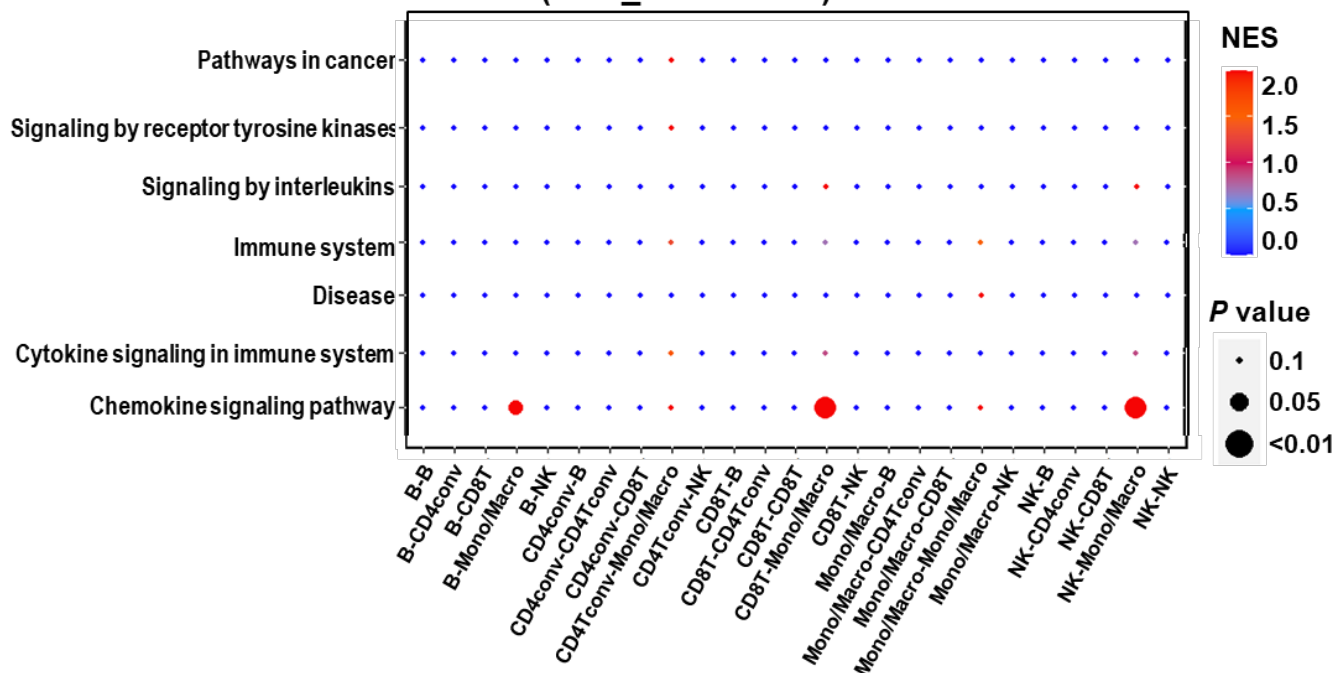

**Fig. S12.** Pathway activities of intercellular communications among cell populations of AML\_GSE116256: conventional CD4<sup>+</sup> T cells (CD4Tconv), CD8<sup>+</sup> T cells (CD8T), monocytes/macrophages (Mono/Macro), B cells (B) and natural killer cells (NK) cells. Only pathways with  $P < 0.1$  in at least one cell populations were retained. NES, normalized enrichment score.



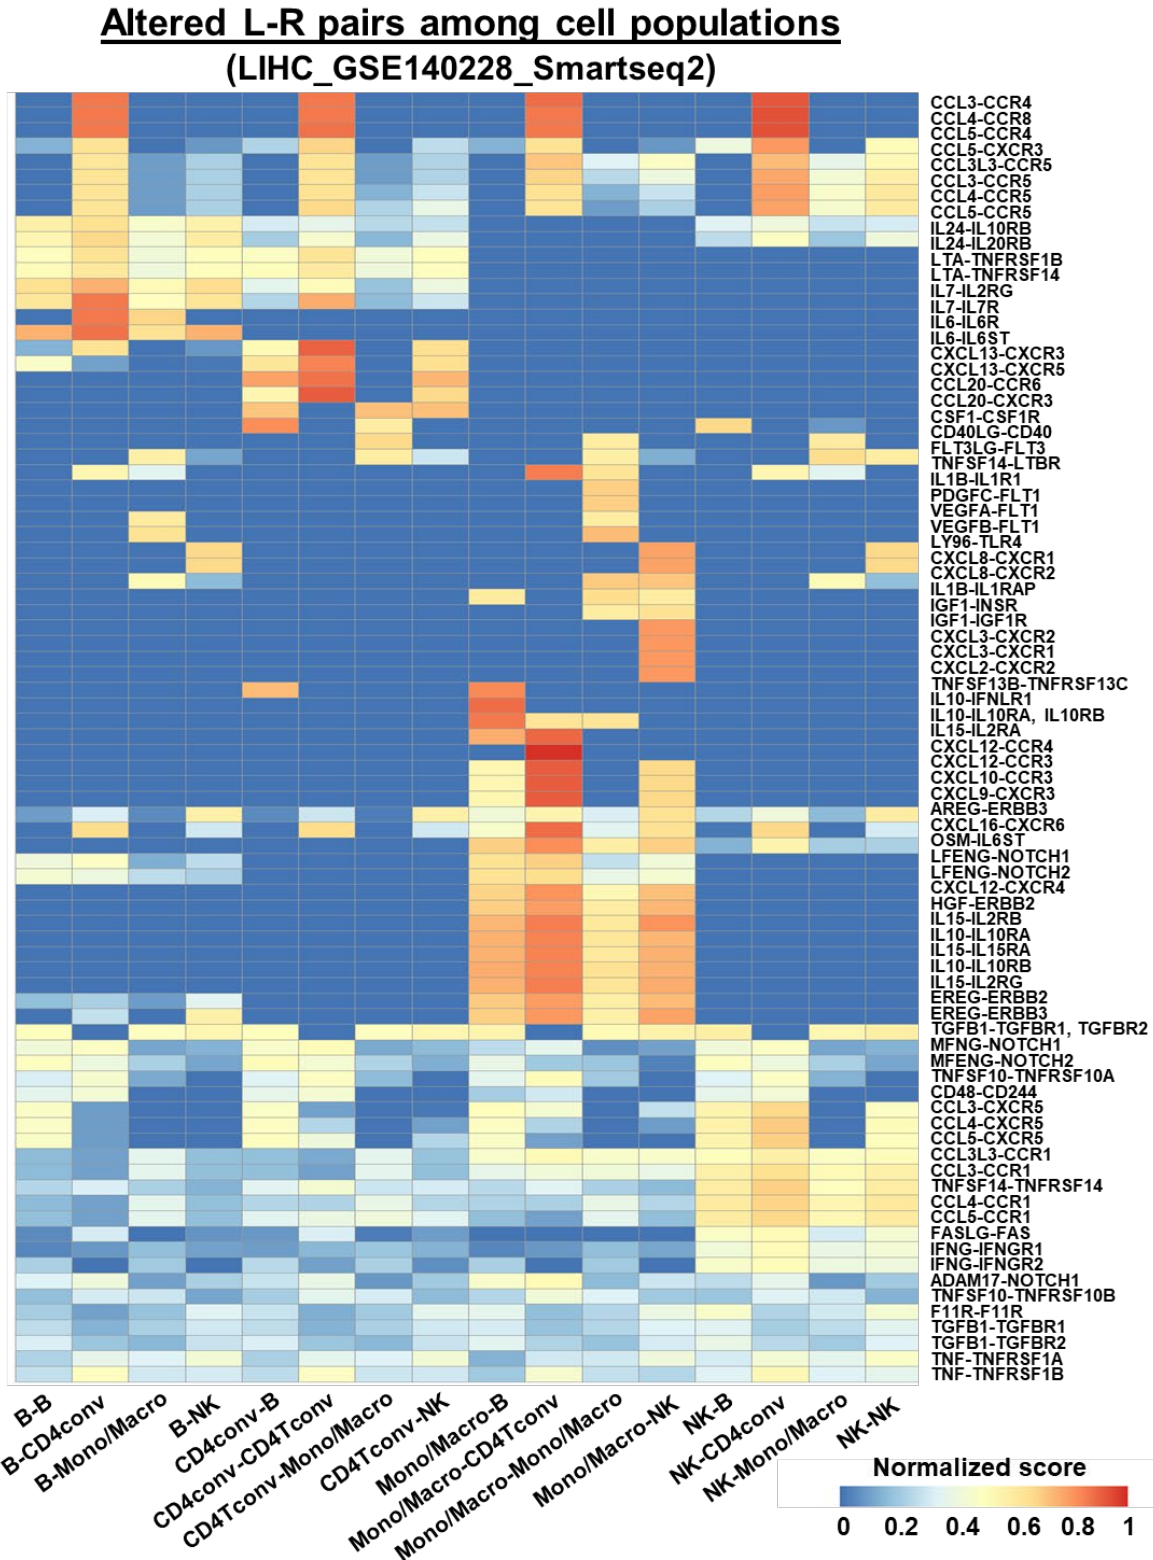

**Fig. S13.** Altered ligand (L)-receptor (R) pairs among cell populations in tumor-specific intercellular communications in LIHC\_GSE140228\_Smartseq2: conventional CD4<sup>+</sup> T cells (CD4Tconv), monocytes/macrophages (Mono/Macro), B cells (B) and natural killer cells (NK). Only transcription factors with GSEA *P*-adjusted values < 0.05 were kept for analysis. A cutoff to define correlated target genes for regulon was denoted as a correlation coefficient = 0.02.

## Pathway activities of intercellular communications among cell populations (LIHC\_GSE140228\_Smartseq2)

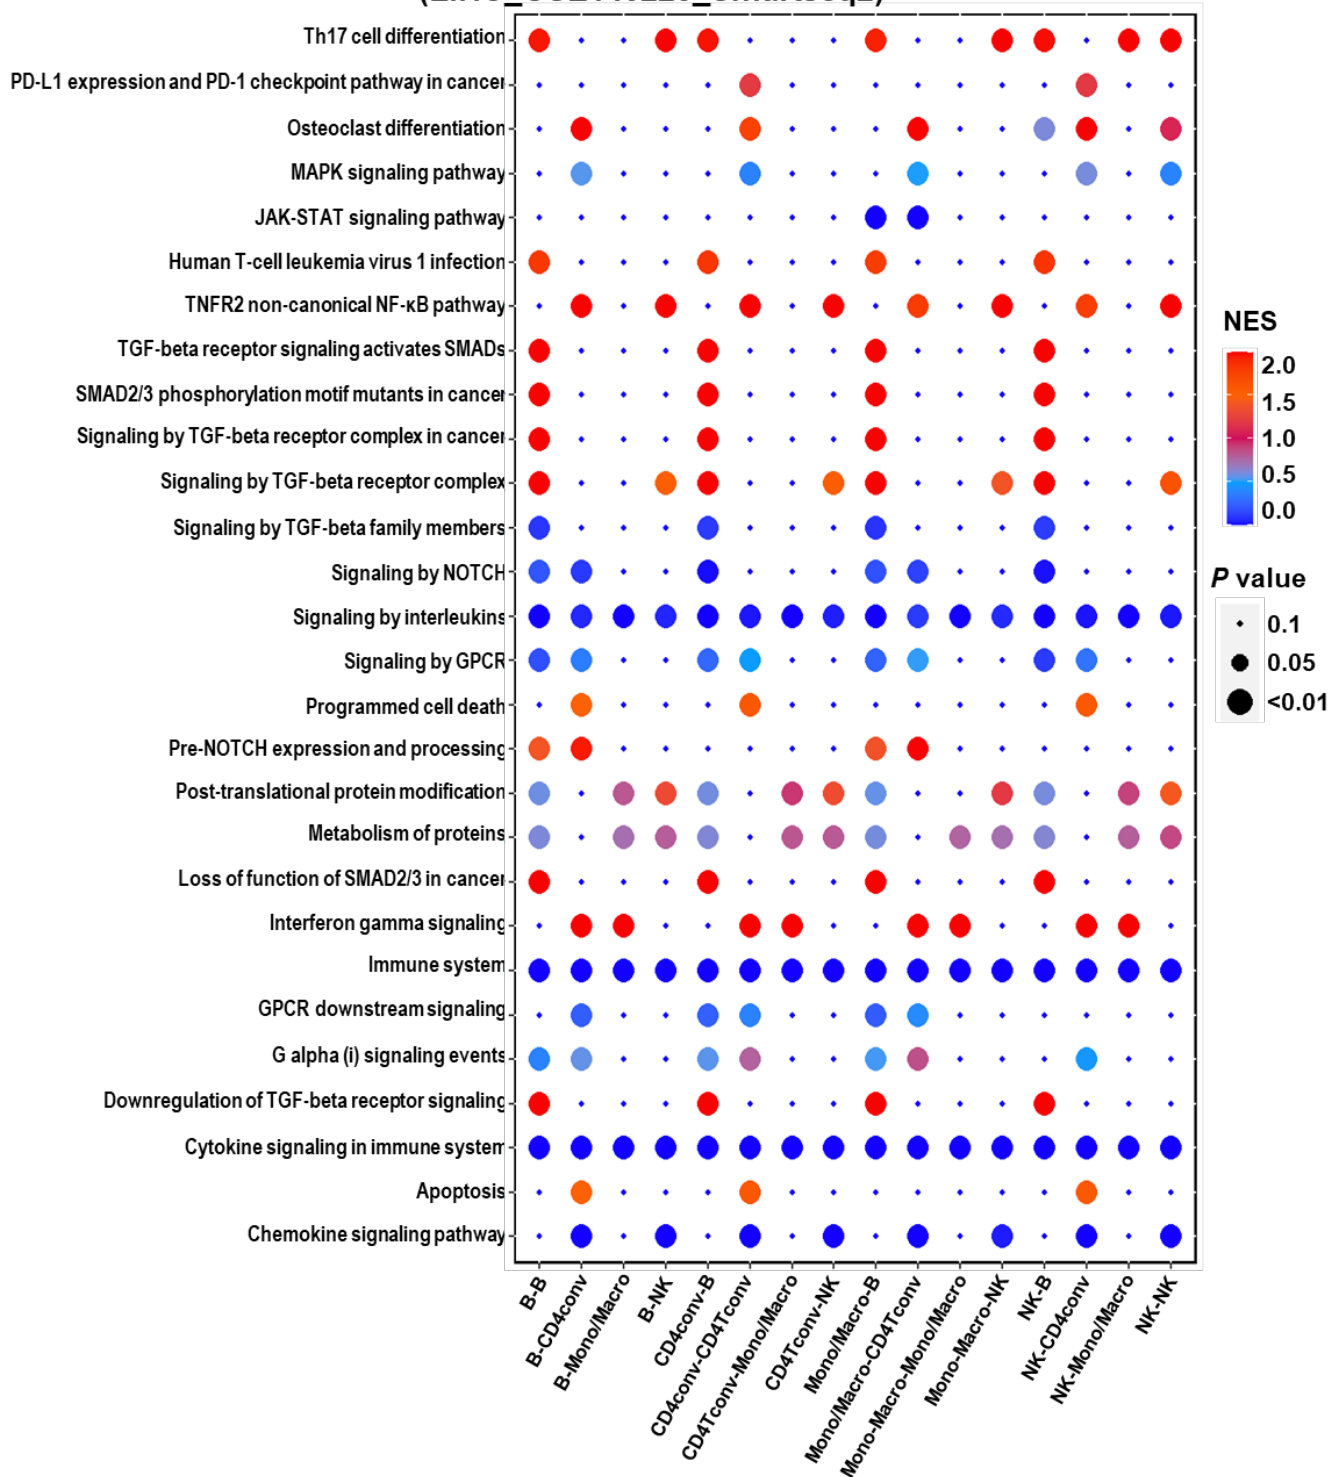

**Fig. S14.** Pathway activities of intercellular communications among cell populations of LIHC\_GSE140228\_Smartseq2: conventional CD4<sup>+</sup> T cells (CD4Tconv), monocytes/macrophages (Mono/Macro), B cells (B) and natural killer cells (NK). Only pathways with  $P < 0.000001$  in at least one cell populations were retained for visualization. NES, normalized enrichment score.

### Altered L-R pairs among cell populations (NSCLC\_GSE117570)

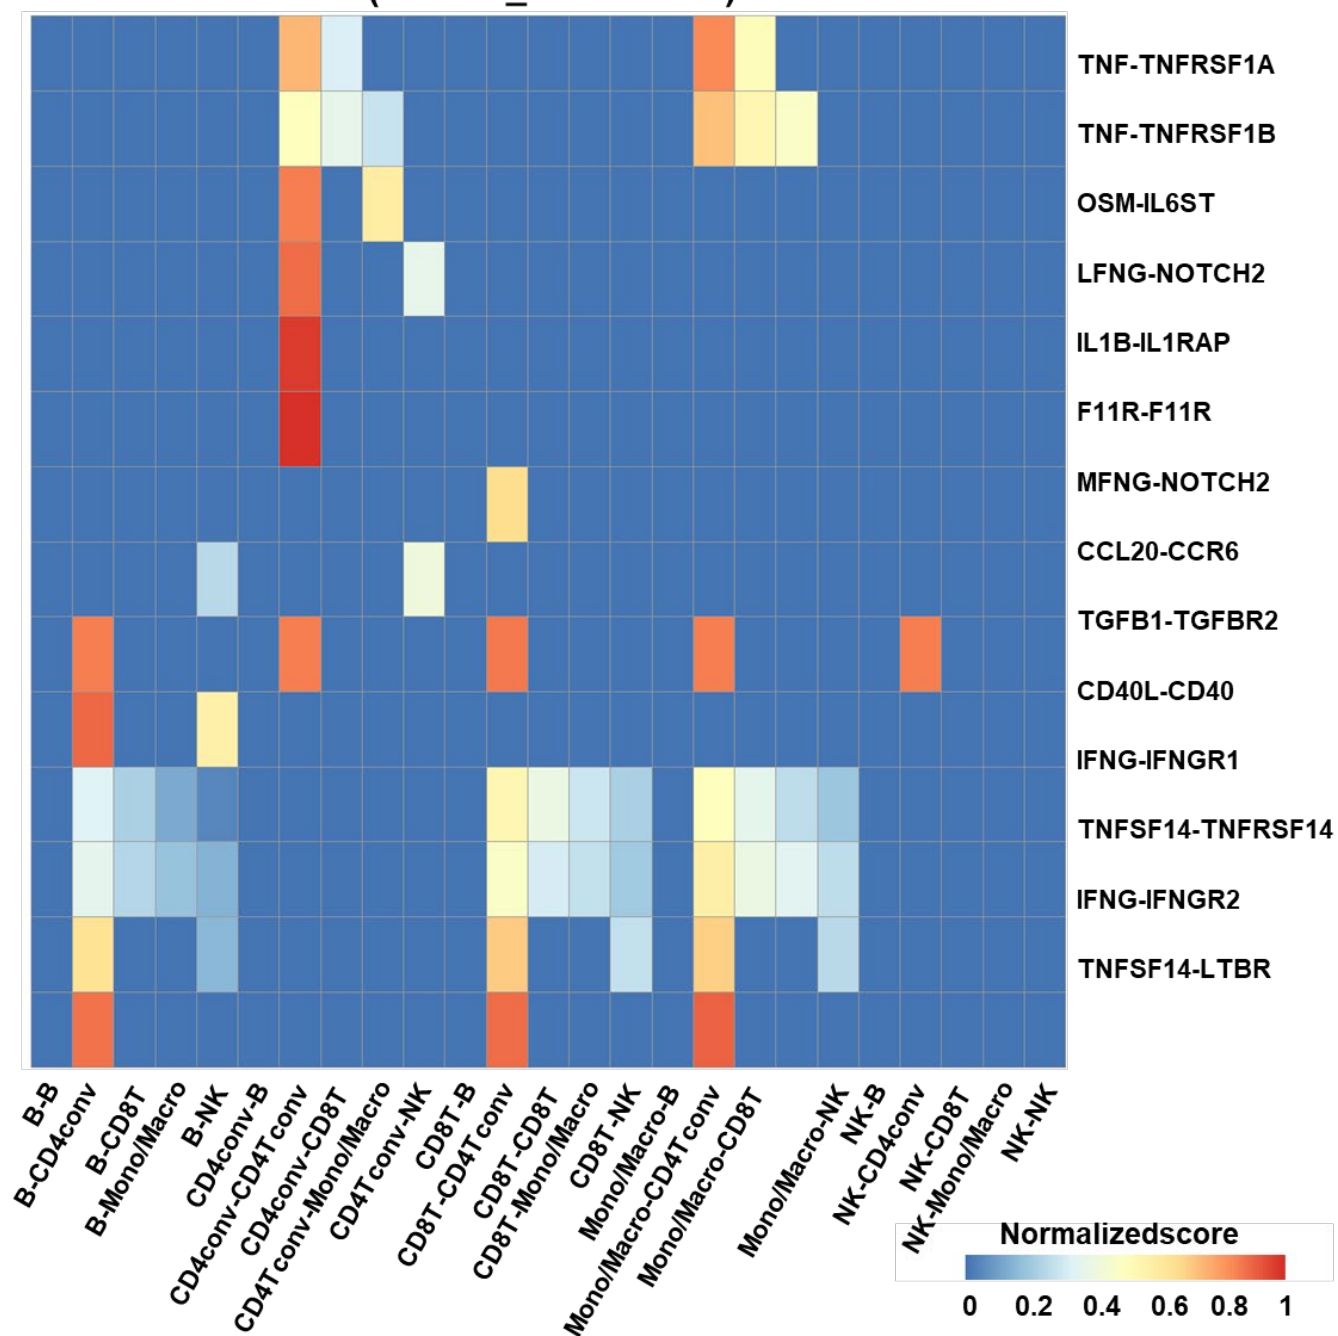

**Fig. S15.** Altered ligand (L)-receptor (R) pairs among cell populations in tumor-specific intercellular communications in NSCLC\_GSE117570: conventional CD4<sup>+</sup> T cells (CD4Tconv), CD8<sup>+</sup> T cells (CD8T), monocytes/macrophages (Mono/Macro), B cells (B) and natural killer cells (NK). Only transcription factors with GSEA *P*-adjusted values < 0.05 were kept for analysis. A cutoff to define correlated target genes for regulon was denoted as a correlation coefficient = 0.1.

## Pathway activities of intercellular communications among cell populations (NSCLC\_GSE117570)

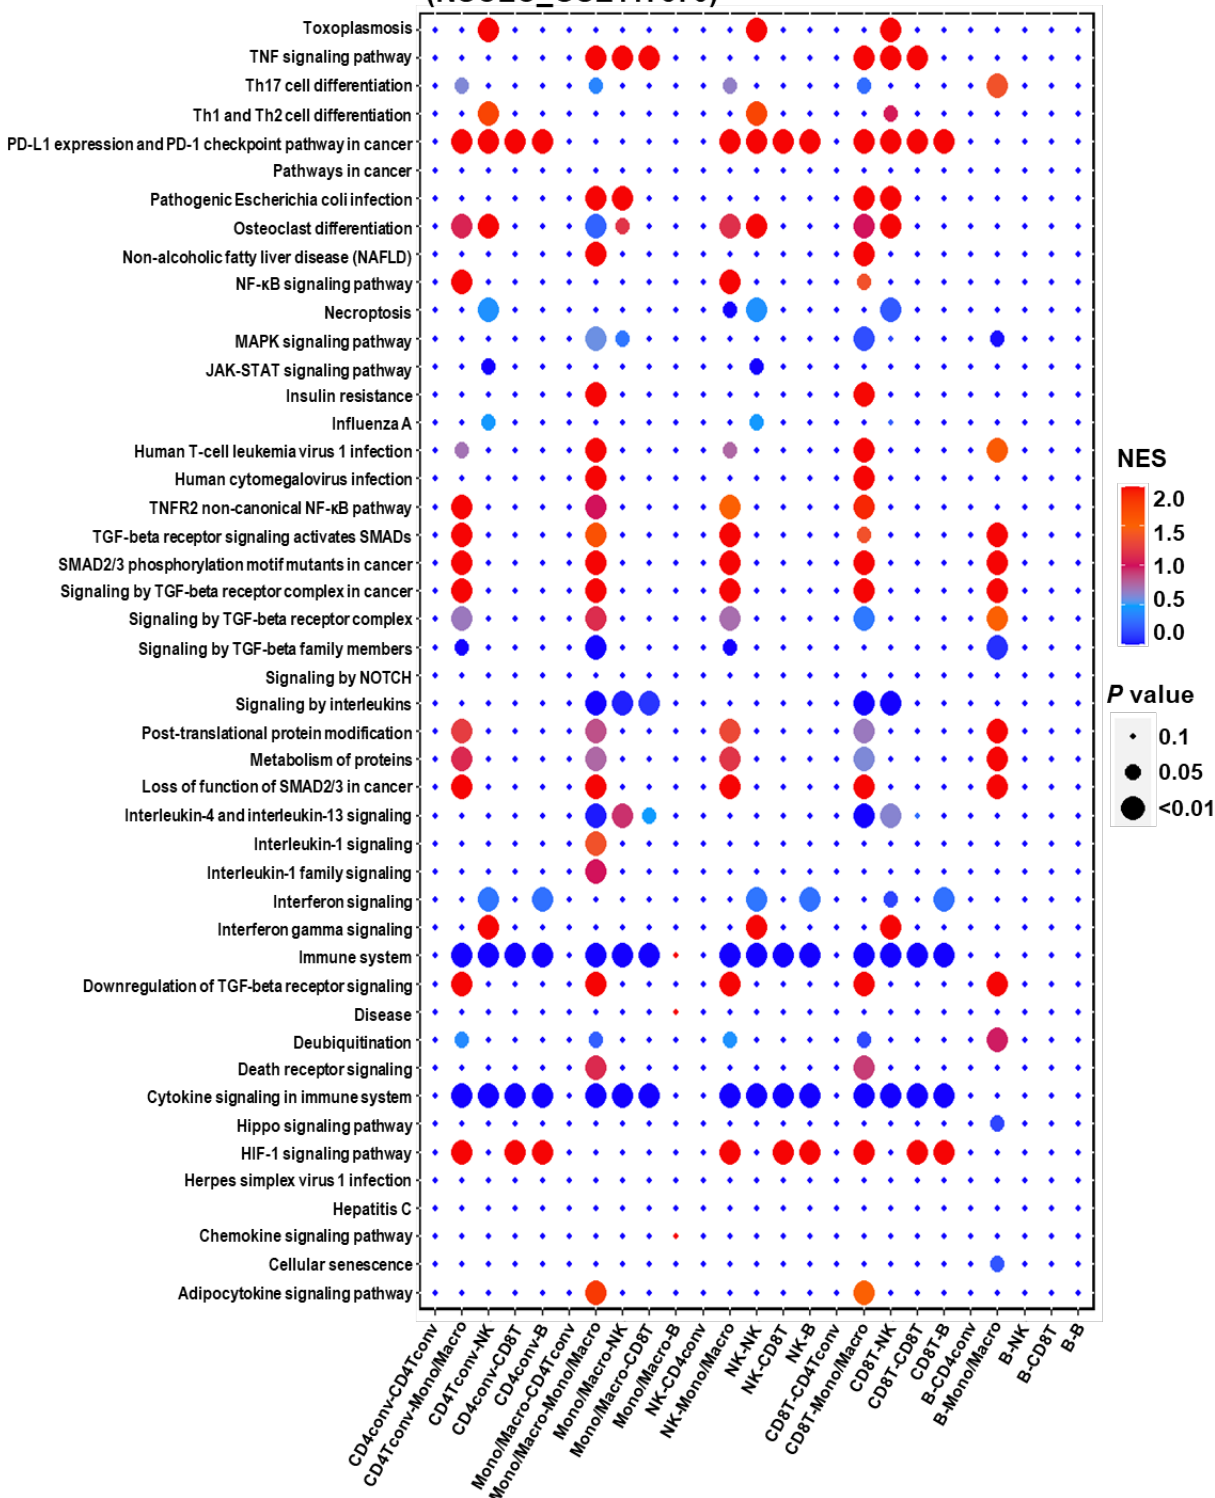

**Fig. S16.** Pathway activities of intercellular communications among cell populations of NSCLC\_GSE117570: conventional CD4<sup>+</sup> T cells (CD4Tconv), CD8<sup>+</sup> T cells (CD8T), monocytes/macrophages (Mono/Macro), B cells (B) and natural killer cells (NK). Only pathways with  $P < 0.1$  in at least one cell populations were retained. NES, normalized enrichment score.



## Altered L-R pairs among cell populations (NSCLC\_GSE139555)

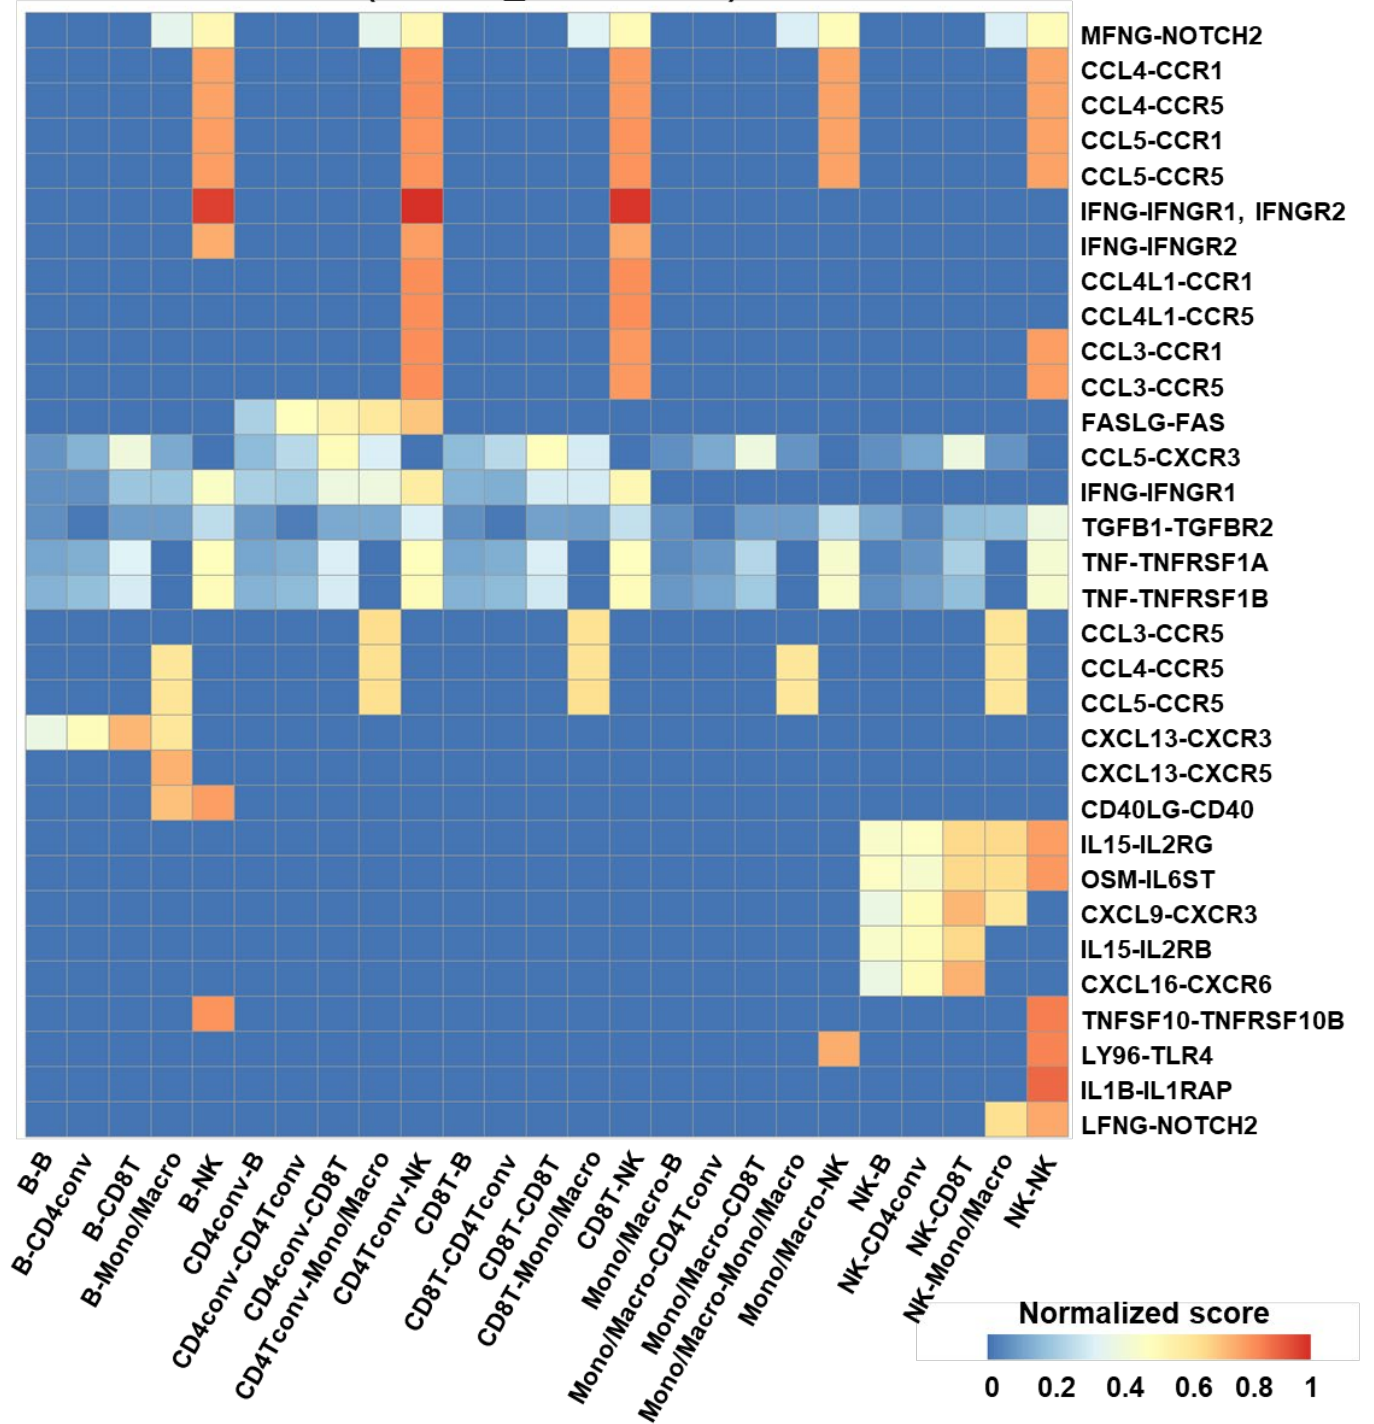

**Fig. S17.** Altered ligand (L)-receptor (R) pairs among cell populations in tumor-specific intercellular communications in NSCLC\_GSE139555: conventional CD4<sup>+</sup> T cells (CD4Tconv), CD8<sup>+</sup> T cells (CD8T), monocytes/macrophages (Mono/Macro), B cells (B) and natural killer cells (NK). Only transcription factors with GSEA *P*-adjusted values < 0.3 were kept for analysis. A cutoff to define correlated target genes for regulon was denoted as a correlation coefficient = 0.02.

## Pathway activities of intercellular communications among cell populations (NSCLC\_GSE139555)

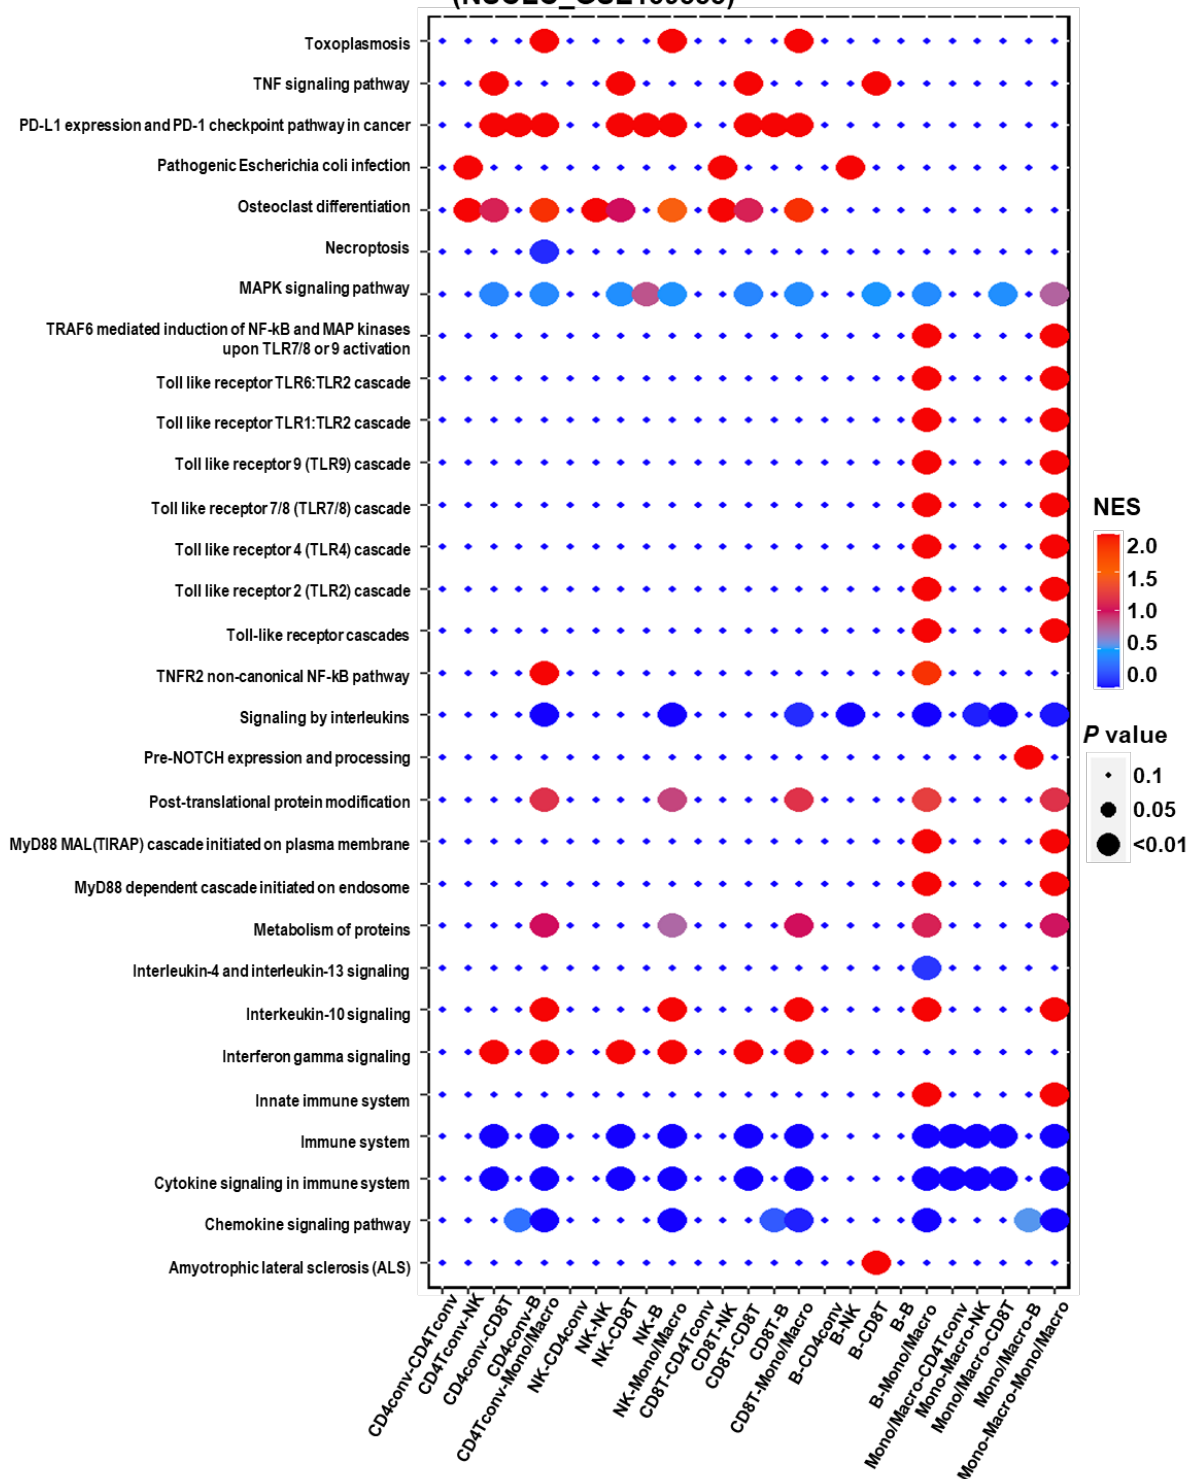

**Fig. S18.** Pathway activities of intercellular communications among cell populations of NSCLC\_GSE139555: conventional CD4<sup>+</sup> T cells (CD4Tconv), CD8<sup>+</sup> T cells (CD8T), monocytes/macrophages (Mono/Macro), B cells (B) and natural killer cells (NK). Only pathways with  $P < 0.000001$  in at least one cell populations were retained for visualization. NES, normalized enrichment score.



## **L-R pairs in the intercellular communications in DADA2 patients**

| <b>NicheNet</b>                                                                                                                                                                                                                                                                                                                                                                                                                                        | <b>CellCallEXT</b>                                                                                                                                                                                                                                                                                                                                                                                                                                                                                                         | <b>NicheNet + CellCallEXT</b>                                     |
|--------------------------------------------------------------------------------------------------------------------------------------------------------------------------------------------------------------------------------------------------------------------------------------------------------------------------------------------------------------------------------------------------------------------------------------------------------|----------------------------------------------------------------------------------------------------------------------------------------------------------------------------------------------------------------------------------------------------------------------------------------------------------------------------------------------------------------------------------------------------------------------------------------------------------------------------------------------------------------------------|-------------------------------------------------------------------|
| CCL5-CCR7<br>HLA-E-CD8A<br>ITGA4-ITGB7<br>ITGB1-CD46<br>ITGB1-ITGA4<br>ITGB2-ICAM2<br>ITGB2-ITGAL<br>PTPRC-CD2<br>PTPRC-CD4<br>SELL-SELPLG<br>SEMA4D-PTPRC<br>ARF1-INSR<br>CCL5-C5AR1<br>HLA-E-PLXNB2<br>HMGB1-LY96<br>ITGB2-ICAM1<br>LRPAP1-LRP1<br>TGFB1-FCN1<br>TGFB1-TLR2<br>ICAM1-IL2RG<br>ICAM1-SPN<br>ITGAM-ICAM2<br>ADAM17-IL6R<br>APP-CD36<br>APP-LRP1<br>APP-SORL1<br>APP-TGFB2<br>APP-TNFRSF14<br>ICAM1-ITGAX<br>ITGAM-ICAM1<br>ITGAM-PLAUR | EFNA4-EPHA4<br>EFNB1-EPHB6<br>IFNG-IFNGR1<br>IFNG-IFNGR2<br>IL1B-IL1RAP<br>IL15-IL2RB<br>IL15-IL2RG<br>IL15-IL15RA<br>CXCL10-CXCR3<br>LTA-TNFRSF1B<br>LTA-TNFRSF14<br>MFNG-NOTCH1<br>MFNG-NOTCH2<br>OSM-IL6ST<br>F11R-F11R<br>PF4-CXCR3<br>CCL2-CCR1<br>CCL2-CCR2<br>CCL5-CXCR3<br>ADAM17-NOTCH1<br>TGFB1-TGFB1<br>TGFB1-TGFB1,TGFB2<br>TNF-TNFRSF1A<br>TNF-TNFRSF1B<br>TNFSF14-LTBR<br>TNFSF14-TNFRSF14<br>TNFSF10-TNFRSF10B<br>TNFSF10-TNFRSF10A<br>CD40LG-CD40<br>CD48-CD244<br>LY96-TLR4<br>LFNG-NOTCH1<br>LFNG-NOTCH2 | CCL3L3-CCR1<br>CCL3-CCR1<br>CCL4-CCR1<br>CCL5-CCR1<br>TGFB1-TGFB2 |

**Fig. S19.** Ligand (L)-receptor (R) pairs in intercellular communications in DADA2 patients identified by NicheNet and CellCallEXT.

**Altered L-R pairs and TFs in the intercellular communications**  
**(from T cells to monocytes of DADA2 patients)**

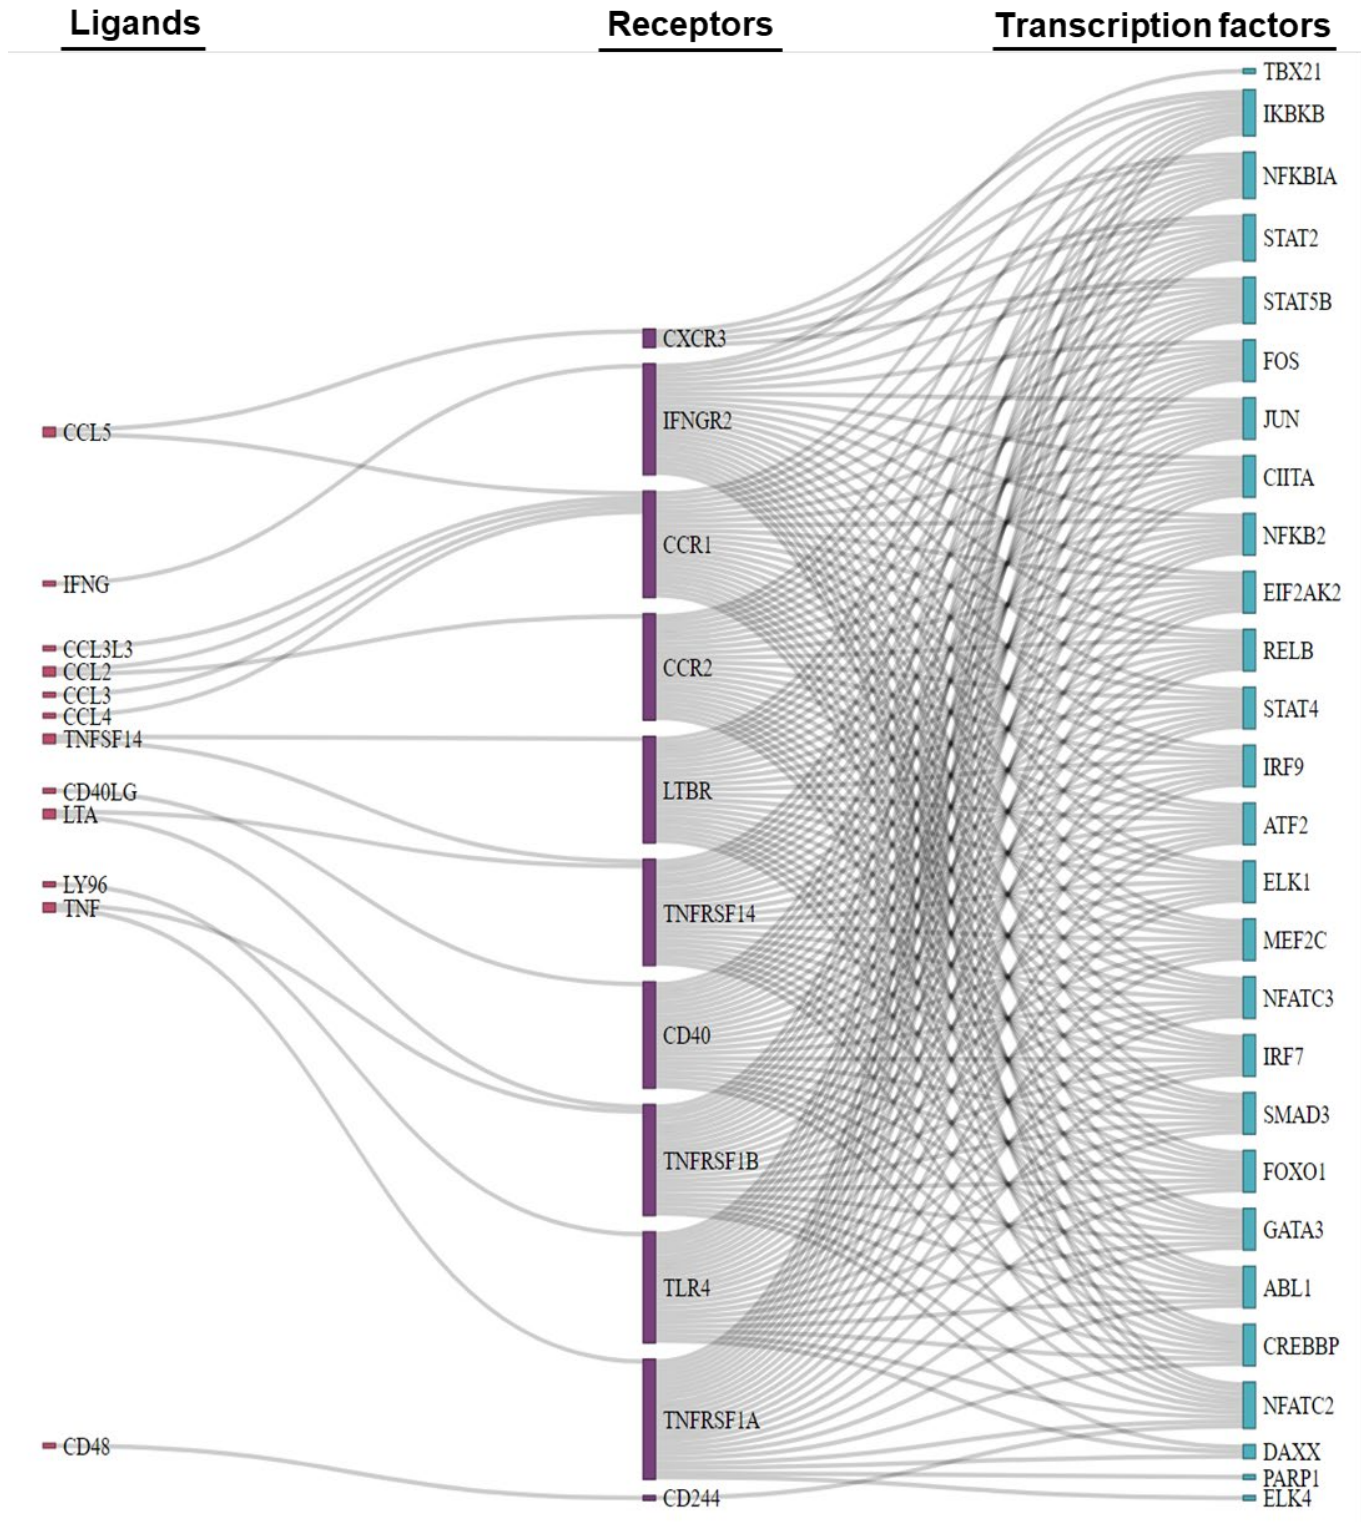

**Fig. S20.** Sankey plot of altered ligand (L)-receptor (R) pairs and downstream transcription factors (TFs) in the intercellular communications from T cells to monocytes of DADA2 patents.

**Altered L-R pairs and TFs in the intercellular communications**  
**(from monocytes and T cells of DADA2 patients)**

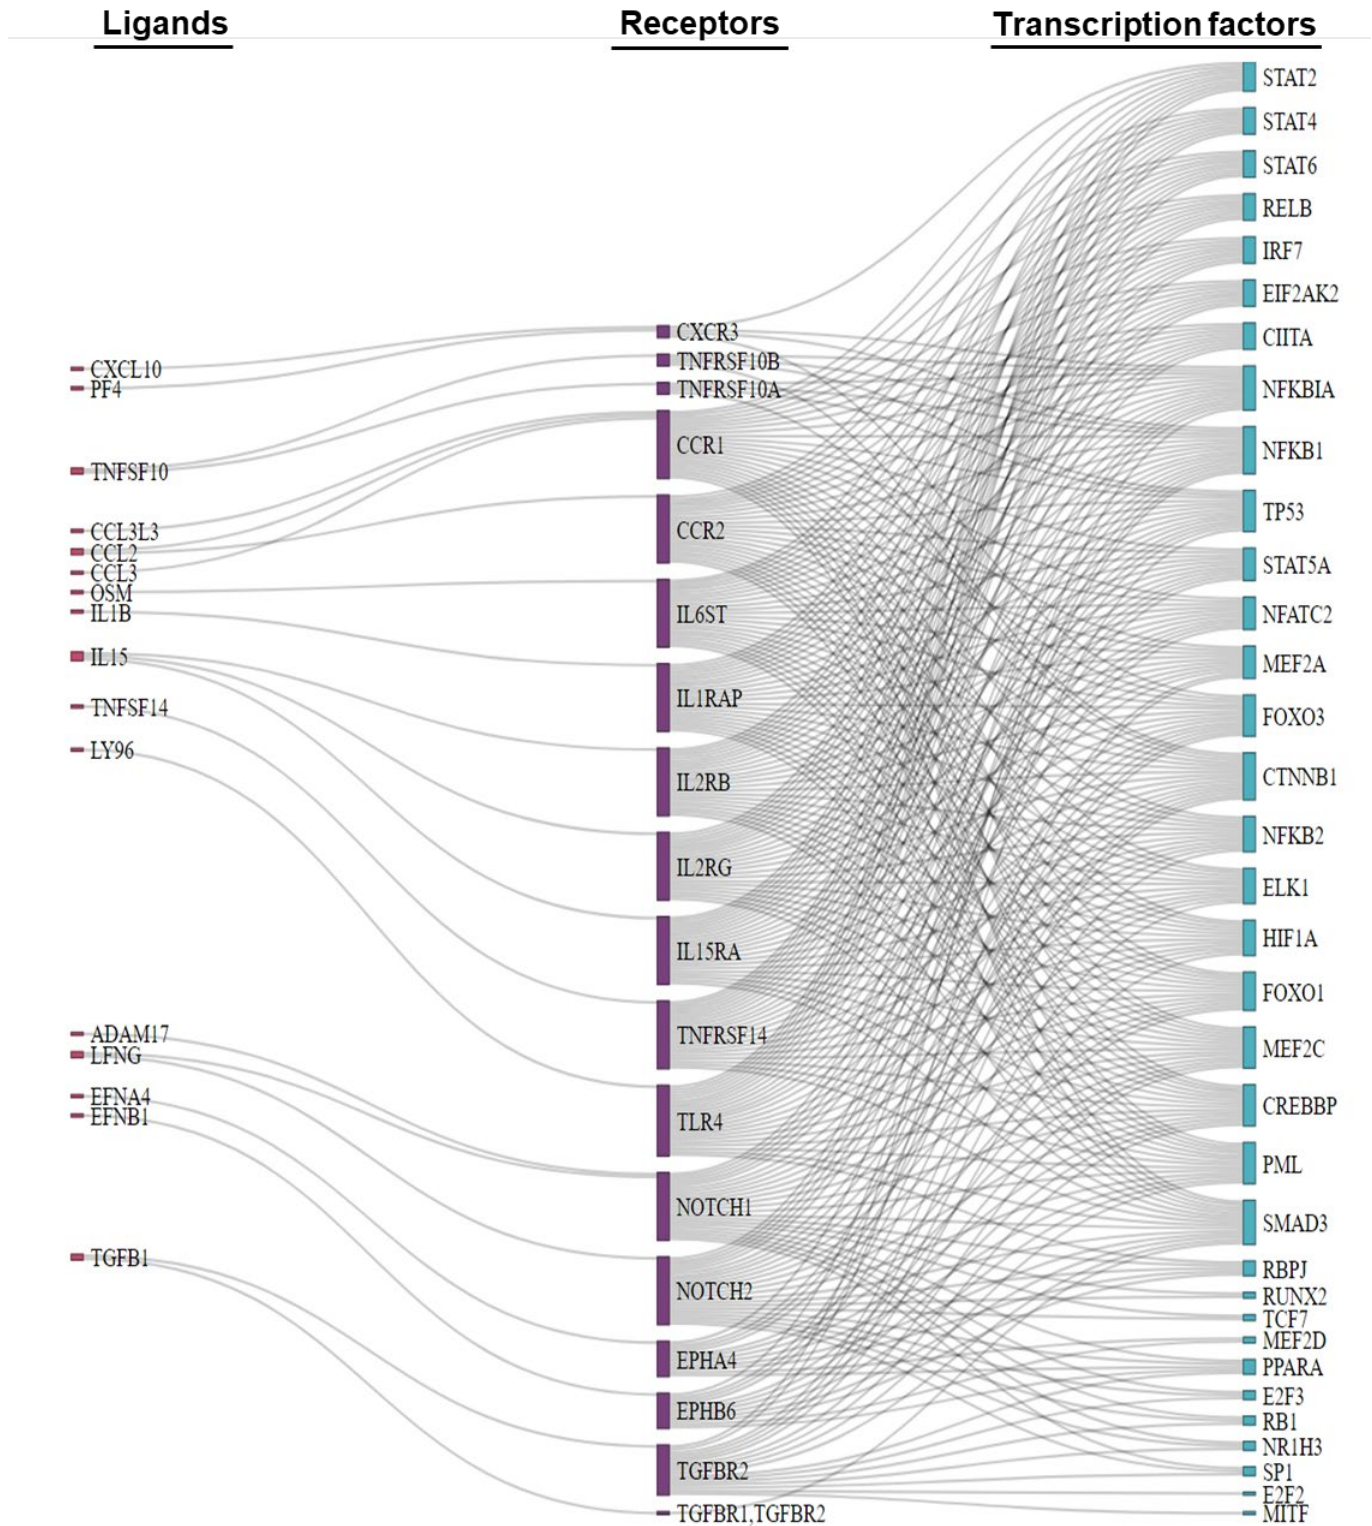

**Fig. S21.** Sankey plot of altered ligand (L)-receptor (R) pairs and downstream transcription factors (TFs) in intercellular communications from monocytes to T cells of DADA2 patents.
